# 1 Ubiquitination drives COPI priming and Golgi SNARE localization

2 Swapneeta S. Date<sup>1</sup>, Peng Xu<sup>1</sup>, Nathaniel L. Hepowitz<sup>2</sup>, Nicholas S. Diab<sup>1</sup>, Jordan Best<sup>1</sup>, Boyang Xie<sup>1</sup>  
3 Jiale Du<sup>3</sup>, Eric R. Strieter<sup>3</sup>, Lauren Parker Jackson<sup>1</sup>, Jason A. MacGurn<sup>2</sup>, Todd R. Graham<sup>\*1,2</sup>

4 <sup>1</sup>Biological Sciences, Vanderbilt University, Nashville, TN 37212, <sup>2</sup>Cell and Developmental Biology,  
5 Vanderbilt University, Nashville, TN 37212, <sup>3</sup>Department of Chemistry, University of Massachusetts  
6 Amherst, Amherst, MA 01003, USA

7 For correspondence: [tr.graham@vanderbilt.edu](mailto:tr.graham@vanderbilt.edu)

8

## 9 Abstract

10 Deciphering mechanisms controlling SNARE localization within the Golgi complex is crucial to  
11 understanding protein trafficking patterns within the secretory pathway. SNAREs are also thought to  
12 prime COPI assembly to ensure incorporation of these essential cargoes into vesicles but the regulation of  
13 these events is poorly understood. Here we report a roles for ubiquitin recognition by COPI in SNARE  
14 trafficking and in stabilizing interactions between Arf, COPI, and Golgi SNAREs. The ability of COPI to  
15 bind ubiquitin through its N-terminal WD repeat domain of  $\beta'$ -COP or through an unrelated ubiquitin-  
16 binding domain (UBD) is essential for the proper localization of Golgi SNAREs Bet1 and Gos1. We find  
17 that COPI, the ArfGAP Glo3 and multiple Golgi SNAREs are ubiquitinated. Notably, the binding of Arf  
18 and COPI to Gos1 is markedly enhanced by ubiquitination of these components. Glo3 is thought to prime  
19 COPI-SNARE interactions; however, Glo3 is not enriched in the ubiquitin-stabilized SNARE-Arf-COPI  
20 complex but is instead enriched with COPI complexes that lack SNAREs. These results support a new  
21 model for how posttranslational modifications drive COPI priming events crucial for Golgi SNARE  
22 localization.

## 23 Introduction

24 The sorting of proteins in the endomembrane system is a highly regulated, vesicle-mediated process  
25 important for many physiological events. Coat proteins drive the formation of vesicles by assembling  
26 onto the cytosolic surface of cellular membranes, where they select cargo proteins<sup>1-4</sup>. COPI-coated  
27 vesicles originate at the Golgi, and mediate retrograde transport between Golgi cisternae or back to the  
28 ER<sup>1,5,6</sup>. COPI is a highly conserved heptameric protein complex ( $\alpha$ ,  $\beta$ ,  $\beta'$ ,  $\gamma$ ,  $\delta$ ,  $\epsilon$  and  $\zeta$  subunits) that is  
29 recruited to Golgi membranes by the small GTP-binding protein Arf (Arf1 and Arf2 in budding yeast)<sup>7-10</sup>.  
30 The N-terminal WD repeat (WDR) domains of  $\alpha$ - and  $\beta'$ -COP recognize sorting signals on cargoes, such  
31 as dilysine motifs commonly found on ER-resident membrane proteins<sup>11-13</sup>. As Golgi cisternae mature

32 from *cis* to *trans* in budding yeast, the retrograde movement of resident proteins becomes critical in order  
33 to maintain a functional Golgi. Resident Golgi proteins, thus, are also important COPI cargo<sup>14-17</sup>.

34  
35 SNAREs are another critical cargo of COPI vesicles because they are essential for vesicle fusion with the  
36 target membrane and are proposed to prime, or nucleate, coat formation<sup>18-21</sup>. In addition to incorporating  
37 v-SNAREs into vesicle membranes, COPI must also mediate retrograde transport of early Golgi t-  
38 SNAREs moving through the Golgi by cisternal maturation to maintain Golgi organization, but how  
39 COPI mediates sorting of SNAREs is poorly understood. Because of the tail-anchored topology of  
40 SNAREs, none of these proteins contain a C-terminal dilysine motif on the cytosolic side of the  
41 membrane where it is accessible to COPI. Few sorting signals have been identified in SNARE proteins  
42 and how they are incorporated into COPI vesicles is incompletely understood<sup>22-29</sup>. The ArfGAP protein  
43 Glo3 may contribute because it is known to interact with COPI, Arf-GTP and SNAREs and is proposed to  
44 be part of the priming complex<sup>19</sup>. However, Glo3 stimulates GTP hydrolysis by Arf to form Arf-GDP,  
45 which destabilizes the COPI coat and is crucial for vesicle uncoating<sup>30</sup>. How these Glo3 interactions are  
46 regulated to allow Arf-GTP mediated COPI assembly during formation and their influence on SNARE  
47 localization is unclear.

48  
49 We recently found that COPI plays a role in the recycling of a budding yeast v-SNARE, Snc1, from the  
50 endocytic pathway to the TGN through recognition of a polyubiquitin (polyUb) signal<sup>31</sup>. The cargo-  
51 binding WDR domains of  $\alpha$ -COP and  $\beta'$ -COP bind specifically to polyUb<sup>31</sup>. Deletion of the  $\beta'$ -COP N-  
52 terminal WDR domain ( $\beta'$ -COP  $\Delta$ 2-304) disrupts Snc1 recycling while replacement of this domain with  
53 unrelated ubiquitin-binding domains restores Snc1 recycling. Thus,  $\beta'$ -COP plays a critical role in this  
54 ubiquitin-dependent trafficking route, but it was unclear if the COPI-ubiquitin interaction is important for  
55 trafficking of any other cargoes. In the current study, we seek to determine if the COPI-ubiquitin  
56 interaction is a general principle of SNARE trafficking. We show that the normal localization of several  
57 SNAREs functioning at the ER-Golgi interface or within the Golgi, including Bet1, Gos1, Snc2, Bos1 and  
58 Sec22, requires COPI-ubiquitin interactions. In addition, several Golgi SNAREs, COPI subunits, and the  
59 ArfGAP Glo3 are ubiquitinated with non-degradative ubiquitin linkages under physiological conditions in  
60 *Saccharomyces cerevisiae*. Importantly, we show that ubiquitination of these components strengthens the  
61 interaction between Golgi SNAREs and COPI while apparently excluding Glo3, providing critical new  
62 mechanistic insight into potential priming mechanisms for COPI vesicle formation. These studies  
63 highlight the finely orchestrated role of posttranslational modification in driving COPI priming and  
64 sorting of a specific set of Golgi SNAREs crucial to the functional organization of Golgi.

65

## 66 Results

### 67 SNAREs mislocalize to morphologically aberrant compartments in the $\beta'$ -COP $\Delta$ 2-304 mutant

68 To determine the dependence of SNARE localization on COPI-ubiquitin interactions, we individually  
69 tagged 16 yeast SNAREs with mNeonGreen (mNG) and expressed them in *S. cerevisiae* wild-type (WT)  
70 cells or in a strain where the ubiquitin-binding N-terminal WDR of  $\beta'$ -COP had been deleted ( $\beta'$ -COP  
71  $\Delta$ 2-304) (**Fig. 1a and Extended Data Table 1**). This  $\beta'$ -COP mutation does not completely eliminate  
72 COPI polyUb binding because  $\alpha$ -COP can also bind polyUb; therefore, the SNAREs were overexpressed  
73 from a strong ADH promoter so the screen would be more sensitive for detecting changes in  
74 localization<sup>31</sup>. Many of the mNG-SNARE fluorescent patterns were indistinguishable between WT and  
75  $\beta'$ -COP  $\Delta$ 2-304 cells (**Extended Data Fig. 1a**). However, for Bet1, Gos1, Snc1, and Snc2, a significant  
76 accumulation of individual SNAREs to elongated tube-like structures and ring-like structures was  
77 observed in  $\beta'$ -COP  $\Delta$ 2-304 (**Fig. 1b-c**). As previously shown for Snc1<sup>31</sup>, Snc2 plasma membrane  
78 localization was also reduced in the COPI mutant. In addition, Sec22 and Bos1 were partially  
79 mislocalized to vacuolar structures in  $\beta'$ -COP  $\Delta$ 2-304 cells (**Extended Data Fig. 1b**). GFP is typically  
80 cleaved from protein chimeras upon arrival in the vacuole. Consistently, immunoblotting of cell lysates  
81 with anti-GFP indicated that 40% of the GFP-Sec22 chimera was cleaved in  $\beta'$ -COP  $\Delta$ 2-304 cells to  
82 release free GFP, in contrast to WT cells where less than 5% was cleaved (**Extended Data Fig. 1c-d**).

83  
84 To test whether the observed morphological changes were caused by SNARE overexpression or loss of  
85 the  $\beta'$ -COP WDR domain, we expressed the Bet1, Snc1, and Snc2 mNG constructs using the weaker,  
86 inducible *CUPI* promoter with a short (1 hr) induction time to approximate physiological protein  
87 abundance<sup>32</sup>. Comparable morphological changes were observed with these SNAREs localizing to  
88 elongated tubular and ring-like structures in  $\beta'$ -COP  $\Delta$ 2-304 relative to WT cells (**Extended Data Fig.**  
89 **2a-b**). Thus, Bet1, Snc1, and Snc2 were localized to aberrant structures whether they were expressed  
90 using a strong, constitutive ADH promoter or the weaker, inducible *CUPI* promoter. All subsequent  
91 imaging studies used the *CUPI* promoter to drive SNARE expression. Together, these data suggest a  
92 dependence of a subset of SNAREs on COPI-ubiquitin interactions for their proper localization.

93  
94 To further characterize the morphological changes observed for SNAREs, we performed colocalization  
95 analysis of Bet1 with Golgi markers. Bet1 significantly colocalized with medial- to late-Golgi marker  
96 Aur1 and did not significantly colocalize with the cis-Golgi marker Sed5 or TGN marker Sec7 in WT  
97 cells (**Extended Data Fig. 3a-b**). In  $\beta'$ -COP  $\Delta$ 2-304, Bet1 is observed in elongated tubular and ring-like  
98 structures (**Fig. 1b, 2c**), but no apparent changes were observed in the morphology of Golgi membranes  
99 containing Sed5, Aur1, and Sec7 in  $\beta'$ -COP  $\Delta$ 2-304 relative to WT cells (**Extended data Fig. 4**).

100 Whereas in WT cells Bet1 and Aur1 colocalized, Bet1 was largely mislocalized to structures in the COPI  
101 mutant that were deficient in Aur1 (**Extended Data Fig. 3c-d**). In addition, Bet1 does not traverse the  
102 plasma membrane in WT or  $\beta'$ -COP  $\Delta$ 2-304 cells and does not recycle back through the ER, consistent  
103 with a prior report<sup>33</sup> (**Extended Data Fig. 3e-f**). Thus, the COPI mutation used here does not cause whole  
104 organelle-level changes in Golgi morphology, and it appears that Bet1 is mislocalizing to a downstream  
105 (*trans*-Golgi) compartment in the COPI mutants tested (**Fig. 1b, Extended Data Fig. 3c,d**).

106

### 107 **$\beta'$ COP binding to ubiquitin is essential for proper SNARE localization**

108 The N-terminal WDR domain of  $\beta'$ COP binds ubiquitin, and the COPI-ubiquitin interaction is critical for  
109 Snc1 retrieval<sup>31</sup>. To determine whether mislocalization of other SNAREs in  $\beta'$ -COP  $\Delta$ 2-304 is due to the  
110 inability of  $\beta'$ COP to bind ubiquitin, we used a set of COPI constructs (**Extended Data Fig. 5b-e**) where  
111 the N-terminal WDR domain of  $\beta'$ COP was replaced with (A) a general ubiquitin-binding domain of  
112 Doa1 (UBD<sub>Doa1</sub>), which is known to bind ubiquitin irrespective of the ubiquitin linkage type<sup>34</sup> and (B) a  
113 ubiquitin-binding domain from Tab2 (NZF<sub>Tab2</sub>) which specifically binds K63-ubiquitin linkages<sup>35</sup>.  
114 Compared to WT cells, Bet1, Gos1, and Snc1 were mislocalized to elongated tube structures in  $\beta'$ -COP  
115  $\Delta$ 2-304 cells as seen previously (**Fig. 1b, Fig. 2a-f**). Replacement of the  $\beta'$ -2-304 domain with the general  
116 ubiquitin-binding domain UBD<sub>Doa1</sub> restored SNARE localization to punctate structures comparable to WT  
117 cells (**Fig. 2a-f**). Surprisingly, however, the K63-linkage restricted  $\beta'$ COP-NZF<sub>Tab2</sub> construct did not  
118 significantly correct the Bet1 or Gos1 localization pattern. We previously found that the  $\beta'$ COP  $\Delta$ 2-304  
119 Snc1 recycling defect was fully corrected by the replacement of the WDR domain with either the  
120 UBD<sub>Doa1</sub> or NZF<sub>Tab2</sub><sup>31</sup>. Consistently, we found here that both the UBD<sub>Doa1</sub> and NZF<sub>Tab2</sub> constructs  
121 significantly restored the WT pattern of intracellular structures labeled with mNG-Snc1 (**Fig. 2b, 2e**).  
122 However, even though Snc2 is functionally and evolutionarily closely related to Snc1, we found that  
123 UBD<sub>Doa1</sub> restored the mNG-Snc2 WT pattern, but the K63-restricted NZF<sub>Tab2</sub> domain did not (**Extended**  
124 **data Fig. 6**). For GFP-Sec22,  $\beta'$ COP-UBD<sub>Doa1</sub> fully prevented vacuolar mislocalization while a partial  
125 rescue was conferred by  $\beta'$ COP-NZF<sub>Tab2</sub> (**Extended data Fig. 1c-d**). Thus, Snc1 and Sec22 can use K63-  
126 linked polyUb chains for their trafficking, but Bet1, Gos1, and Snc2 appear to rely on COPI binding to  
127 some other ubiquitin linkage type.

128

129 Next, we examined the localization of mNG-tagged Bet1, Snc1, and Snc2 in a temperature-sensitive  
130 COPI mutant (*ret1-1*) grown at the permissive temperature and shifted to the non-permissive temperature  
131 of 37°C for 1 hr. The *ret1-1* mutation is within  $\alpha$ -COP and substantially inactivates all known COPI  
132 functions<sup>5, 14, 36</sup>. Bet1, Snc1, and Snc2 were mislocalized to tubular and ring-like structures in *ret1-1* at the  
133 non-permissive temperature (**Fig. 2a-f, Extended data Fig. 6**). Interestingly, the mislocalization pattern

134 seen for Bet1, Snc1, and Snc2 in  $\beta'$ -COP  $\Delta 2$ -304 cells was comparable to *ret1-1* at the non-permissive  
135 temperature (**Fig. 1b-c, Fig. 2a-c**). These data indicate that perturbations in the ability of  $\beta'$ -COP to bind  
136 ubiquitin in  $\beta'$ -COP  $\Delta 2$ -304 substantially disrupt COPI function with respect to Bet1, Snc1, and Snc2  
137 localization. We previously showed that  $\beta'$ -COP  $\Delta 2$ -304 does not perturb Golgi to ER trafficking of  
138 cargoes bearing the KKXX or HDEL motifs<sup>31</sup>. Thus, it is the ability of the  $\beta'$ -COP N-terminal WDR  
139 domain to bind ubiquitin, not dilysine motifs, that is critical for SNARE localization.

140

141  $\beta'$ -COP has been shown to bind K63 polyubiquitin (polyUb) chains but not K48 polyUb or  
142 monoubiquitin (monoUb)<sup>31</sup>. Since a general ubiquitin-binding domain rescued the localization for all 4  
143 SNAREs, but not K63-specific ubiquitin-binding domain (**Fig. 2a-f**), we reasoned that  $\beta'$ -COP might be  
144 able to bind other polyUb chains. To test this hypothesis, we assayed the ability of heterologously  
145 purified GST-tagged  $\beta'$ -COP to bind K6-, K11-, K29-, K33-, and linear (M1)-linked polyUb chains. K63-  
146 polyUb was used as a positive control, and GST-only was used to determine background levels of  
147 ubiquitin-binding to GST (**Fig. 2g-h**).  $\beta'$ -COP is capable of binding linear ubiquitin chains and more  
148 weakly to K6-, K11- and K29- polyUb chains (**Fig. 2g-h**).

149

#### 150 **Fusion of a deubiquitinase domain to COPI leads to SNARE mislocalization**

151 To analyze the functional significance of ubiquitination within the COPI-SNARE system, we designed  
152 constructs where a deubiquitinase domain, UL36 (DUB) from Herpes Simplex Virus 1<sup>37</sup>, was fused to  
153 either  $\alpha$ -COP or  $\beta'$ -COP. A catalytically dead version of UL36 (DUB\*) wherein an active site Cys is  
154 mutated to Ser and thus cannot deubiquitinate substrates was engineered as a control. Strains expressing  
155 COPI-DUB constructs, irrespective of whether  $\alpha$ -COP or  $\beta'$ -COP was fused to DUB, were enlarged in size  
156 (**Fig. 3a, b**). Additionally, we observed mislocalization of Bet1 and Gos1 in COPI-DUB constructs  
157 wherein mNG-tagged SNAREs were observed in enlarged punctate structures, elongated tube structures,  
158 or ring-like structures (**Fig. 3a, c**). COPI-DUB\* constructs did not display significant phenotypic changes.  
159 The fusion of a DUB domain to COPI phenocopies the mislocalization pattern for Bet1 and Gos1 in the  
160 COPI (*ret1-1*) mutant at nonpermissive temperatures, supporting the importance of ubiquitination in  
161 COPI mediated regulation of SNARE localization.

162

#### 163 **Ubiquitination is associated with Gos1, Ykt6, and Sed5 SNARE complexes**

164 Global analyses of the budding yeast proteome have identified ubiquitinated lysines in Gos1, Snc1, and  
165 Snc2 but not Bet1<sup>38</sup>. We set out to test if ubiquitination could be detected by immunoprecipitating the  
166 SNAREs and probing for ubiquitin on immunoprecipitated samples and by detecting the pooled ubiquitin  
167 released off of immunoprecipitated samples following a deubiquitinase (DUB) treatment. We individually

168 tagged Bet1, Gos1, and Snc1 with 6xHIS-TEV-3xFLAG at their C-termini by chromosomal integration of  
169 the tag constructs. Following FLAG immunoprecipitation, the samples were treated with mock buffer (no  
170 DUB) or deubiquitinases (DUB) (**Fig. 4a**) and probed with FLAG (**Fig. 4b**) or ubiquitin antibodies (**Fig.**  
171 **4c**). Art1, a ubiquitinated protein from *S. cerevisiae*, was used as a positive control, and untagged cells  
172 (Ctrl) were used as a negative control. The FLAG antibody recognizes a nonspecific band at  
173 approximately 20 kDa (**Fig. 4b, Ctrl Lane**) that unfortunately co-migrates with Bet1-FLAG and Snc1-  
174 FLAG as indicated by the increased band intensity at 20 kDa in those samples relative to the untagged  
175 control (Ctrl) sample. In addition, Bet1-FLAG exhibited a significant smear extending to greater than 40  
176 kDa (**Fig. 4b**). However, this smeared pattern for Bet1-FLAG was not collapsed by DUB treatment, nor  
177 was this smear recognized by the anti-ubiquitin antibody. Moreover, the amount of monoUb released  
178 from Bet1-FLAG by DUB treatment was not significantly different from the control sample (**Fig. 4c-d**).  
179

180 For Gos1-FLAG immunoprecipitations probed with anti-ubiquitin antibody, a smeared pattern was  
181 observed in the 50-80 kDa molecular weight region (**Fig. 4b**) when probed with anti-Ub, which collapsed,  
182 releasing a significant amount of monoUb following DUB treatment (**Fig 4c-d, Gos1 lanes**). A similar  
183 smeared pattern is seen for Art1 in mock-treated samples around 75-130 kDa molecular weight region,  
184 which was converted to monoUb by DUB treatment (**Fig 4c-d, Art1 lanes**). Although the smeared pattern  
185 for Snc1 was not apparent in these samples, DUB treatment released more monoUb than control samples  
186 (**Fig 4d, Snc1**). We initially focused our attention on Gos1 because it appeared to be ubiquitinated and  
187 evidence for the importance of Snc1 ubiquitination has already been reported<sup>31, 39</sup> (**Fig. 4c-d**).  
188

189 To identify other proteins specifically associated with Gos1 when purified under conditions that preserved  
190 ubiquitination, we employed a Stable Isotope Labeling by/with Amino acids in Cell culture (SILAC)  
191 mass spectrometry approach. A strain expressing Gos1-FLAG was grown in a light isotope medium and  
192 untagged control cells used to determine the nonspecific background proteins in the FLAG IP, were  
193 grown in a heavy isotope medium. Importantly, the samples were processed in the presence of DUB-  
194 inhibitors to preserve ubiquitination on Gos1 and other proteins in the samples. Gos1 is reported to form a  
195 functional t-SNARE complex with Ykt6 and Sed5 that mediates fusion with intra-Golgi retrograde  
196 vesicles bearing Sft1<sup>40</sup>. We observed significant enrichment of peptides from these partner SNAREs with  
197 Gos1-FLAG and known SNARE regulators like Sec17 and Sly1<sup>41, 42</sup> (**Fig. 4e**). Importantly, we also found  
198 several COPI subunit peptides that were enriched to comparable levels as Ykt6, Sft1, and Sed5 in the  
199 Gos1 pulldown samples (**Fig. 4e**).  
200



201 To probe the ubiquitination status of Gos1-binding SNARE partners, we individually tagged Ykt6 and  
202 Sed5 with 3xHA tag on the N-terminus (attempts at C-terminally tagging Ykt6 and Sed5 were  
203 unsuccessful potentially owing to structurally/functionally important modifications at the C-terminus,  
204 such as Ykt6 palmitoylation). HA-tagged Ykt6 and Sed5 were immunoprecipitated using anti-HA and  
205 probed for their ubiquitination status. A smeared pattern associated with ubiquitination was observed for  
206 both Ykt6 (**Fig. 4f**) and Sed5 (**Fig. 4h**) in mock-treated samples, which was collapsed by DUB treatment  
207 to monoUb (**Fig. 4f-i**). These data support previously published high-throughput results indicating that  
208 Gos1, Ykt6, and Sed5 are ubiquitinated<sup>38</sup>. The differences in the size distributions of polyUb smear in  
209 each SNARE immunoprecipitate suggest that this assay is primarily detecting direct modification of  
210 Gos1, Ykt6, and Sed5 as opposed to the aggregate polyUb associated with the entire SNARE complex.

211

### 212 **Non-degradative ubiquitination is associated with Gos1, COPI, and Glo3 complexes**

213 We observed significant enrichment of COPI subunits in the Gos1 pulldown samples analyzed with  
214 SILAC mass spectrometry (**Fig. 4e**). Therefore, we probed the ubiquitination status of FLAG-tagged  
215 COPI ( $\alpha$ - and  $\beta'$ -COP subunits) and Glo3, as this ArfGAP is reported to bind COPI and SNAREs<sup>19</sup>. The  
216 FLAG IPs probed with anti-ubiquitin antibody show a substantial amount of monoUb released from  
217 COPI and Glo3 immunoprecipitates following the DUB treatment (**Extended Data Fig. 7a-e**). K48-  
218 linked polyUb chains are known to target proteins for proteasomal degradation. To address whether Gos1,  
219 COPI, and Glo3 complexes are modified with K48-linked polyUb, we treated the samples with a K48-  
220 specific DUB. No significant change in the smeared electrophoretic pattern or the release of monoUb in  
221 the samples was observed with or without K48-specific DUB treatment suggesting that the ubiquitination  
222 associated with COPI and Glo3 is not a degradation signal (**Extended Data Fig. 7a-e**).

223

224 We also probed Gos1, Ykt6, Sed5, COPI, and Glo3 FLAG-immunoprecipitated samples with K63  
225 specific deubiquitinase (K63-DUB<sup>43</sup>), linear-ubiquitin specific deubiquitinase (M1-DUB<sup>44</sup>) or a general  
226 deubiquitinase (DUB<sup>45</sup>) as a control (**Extended Data Fig. 8**). No significant release of ubiquitin was  
227 observed following K63- or M1-DUB treatment compared to the untagged control (**Extended Data Fig.**  
228 **8**). A detectable amount of ubiquitin was released from Gos1 following K63-DUB treatment, but the  
229 signals were not significantly above the background levels (**Extended Data Fig. 8**). A significant level of  
230 released ubiquitin was detected for these samples when treated with the general deubiquitinase. The lack  
231 of K63 linkages on these components is also consistent with live-cell imaging data (**Fig. 2a-f**), showing  
232 that  $\beta'$ -COP with a K63-specific binding domain failed to support the trafficking of Bet1, Gos1, and  
233 Snc2. Thus, the ubiquitination associated with Gos1, COPI, and Glo3 complexes appears to be non-

234 degradative (non-K48 or non-K63) in nature and may modulate protein interactions in the COPI-  
235 dependent retrieval of SNAREs within the Golgi.

236

### 237 **Ubiquitination stabilizes Golgi SNARE-COPI complexes**

238

239 To explore the possibility that ubiquitination is an important regulator of protein-protein interactions in  
240 the COPI-SNARE system, we used comparative pulldown studies using FLAG-tagged SNAREs under  
241 conditions that preserved endogenous ubiquitination (w Ub) or catalyzed removal of ubiquitin (w/o Ub)  
242 (**Fig. 5a**). An equal amount of Gos1-FLAG was pulled down in both w Ub and w/o-Ub conditions (**Fig.**  
243 **5c**). Probing samples with a ubiquitin antibody showed a ubiquitin smear associated with Gos1  
244 immunoprecipitated using 'w Ub' conditions, most of which was stripped off under 'w/o-Ub' conditions  
245 (**Fig. 5b**). We next probed these samples with COPI and Arf antibodies. Significant enrichment of COPI  
246 subunits and Arf was observed with Gos1 when ubiquitination was preserved, compared to 'w/o-ub'  
247 conditions (**Fig. 5 e-g**). The ubiquitination, thus, appears to play a role in the assembly and/or stability of  
248 COPI coatomer complex with Gos1.

249

250 Our assays and previous reports indicate that Gos1 is ubiquitinated<sup>38</sup>, but ubiquitination has not been  
251 detected on Bet1 (**Fig. 4b-d**). Loss of the ubiquitin-binding domain of COPI in  $\beta'$ -COP  $\Delta$ 2-304 led to  
252 mislocalization of both Bet1 and Gos1 to the elongated tube- and ring-like structures (**Fig.1b, Fig. 2a,c**).  
253 Therefore, we tested whether ubiquitination affects the interaction of Bet1 with COPI coat complex  
254 components. The smeared pattern associated with Bet1 in the blot probed with anti-FLAG antibody is  
255 similar under 'w Ub' and w/o Ub' conditions (Extended Data **Fig 9b-c**). Nonetheless, we see the  
256 enrichment of COPI subunits with Bet1 under 'w Ub' conditions compared to 'w/o Ub' (Extended Data  
257 **Fig. 9d**). Similarly, Arf is significantly enriched with Bet1 when ubiquitin was present on the complexes  
258 (Extended Data **Fig. 9e-f**). Control experiments indicated that the presence of DUB inhibitors during cell  
259 lysis was most critical to preserve the SNARE-COPI complex (**Fig.5a, Extended Data Fig 9g,h**).  
260 Therefore, the role of ubiquitination in the assembly and stability of COPI coatomer complex with Bet1  
261 appears to function independently of the Bet1 ubiquitination status. Altogether, the data reveal ubiquitin-  
262 mediated stabilization of COPI-Golgi SNARE complexes.

263

### 264 **Glo3 is not enriched in ubiquitin-stabilized SNARE-COPI-Arf complexes and Gos1 localization is** 265 **unaffected in *glo3Δ* cells**

266 Glo3 is proposed to be part of a SNARE-Arf-COPI priming complex but we failed to detect any Glo3  
267 peptides in the Gos1 immunoprecipitates by mass spectrometry (**Fig. 4e**). To further test whether ArfGAP  
268 Glo3 is present in the ubiquitin-stabilized SNARE-COPI-Arf complex, we performed Gos1-FLAG



269 pulldowns under w Ub and w/o-Ub conditions in cells expressing Glo3 C-terminally tagged with GST.  
270 We detected a small amount of Glo3-GST co-immunoprecipitating with FLAG-Gos1, but no significant  
271 difference was observed in the presence or absence of Ub (**Fig. 6a,c**). In contrast, association of Arf with  
272 Gos1 was significantly enriched using w Ub conditions compared to w/o-Ub conditions (**Fig. 6a,d**). Cell  
273 lysate controls probed for GST in cells expressing only Gos1-FLAG or both FLAG-Gos1 and Glo3-GST  
274 confirmed the identity of the Glo3-GST band (**Fig. 6b**).

275

276 To determine whether we can detect Glo3 interaction with COPI, we performed SILAC  
277 coimmunoprecipitation analysis using C-terminally FLAG-tagged  $\alpha$ -COP under ubiquitin preserved  
278 conditions. As expected, Glo3 was enriched with COPI, indicating eventual recruitment of Glo3 onto the  
279 COPI coat (**Fig. 6f**). The COPI sample was also enriched for several ER residence membrane proteins  
280 bearing C-terminal dilysine motifs (Fig. 6f, red datapoints). However, no SNAREs were  
281 coimmunoprecipitated with COPI, indicating that the COPI complexes recovered here were significantly  
282 different from SNARE-COPI complexes that contained Gos1.

283

284 In addition, we analyzed mNG-Gos1 localization in *glo3 $\Delta$*  cells with WT and  $\beta'$ COP  $\Delta$ 2-304 cells as  
285 control. Compared to WT cells, no significant changes in the size or distribution of mNG-Gos1 punctae  
286 were observed in *glo3 $\Delta$*  (Fig. 6g). As reported earlier, Gos1 is mislocalized to elongated tube-like  
287 structures in  $\beta'$ COP $\Delta$ 2-304 cells. Together, these data suggest that Glo3 can weakly bind Gos1 but unlike  
288 COPI, this interaction is not stabilized by the presence of Ub. In addition, Glo3 does not appear to be  
289 required for COPI-dependent Gos1 localization.

290

291 Altogether, these results indicate that ubiquitin plays critical role in stabilizing a complex between  
292 SNAREs, COPI and Arf that is important for COPI function in retrieving a subset of SNAREs. Glo3  
293 appears to be mostly excluded from the ubiquitin-stabilized Gos1-Arf-COPI complex

294

## 295 **Discussion**

296 We previously discovered that COPI binds specifically to polyUb chains and that this interaction is  
297 crucial for recycling Snc1, an exocytic v-SNARE, back to the TGN. In this study, we broadly probed the  
298 role of COPI-ubiquitin interactions on the localization of 16 additional budding yeast SNAREs to  
299 determine whether ubiquitination of coat components is a general mechanism for SNARE sorting. While  
300 localization of most mNG-tagged SNAREs was unaffected by deletion of the ubiquitin-binding N-  
301 terminal WDR domain of  $\beta'$ -COP, we found a significant change in the localization pattern for Bet1,

302 Gos1, Snc1, Snc2 and partially for Bos1 and Sec22 in  $\beta'$ -COP  $\Delta$ 2-304 (**Fig. 1b-c, Fig. 2 a-f, Extended**  
303 **Data Fig. 1**). Normal SNARE localization is restored by the replacement of  $\beta'$  COP N-terminal WDR  
304 domain ( $\beta'$  COP-UBD) with an unrelated ubiquitin-binding domain (**Fig. 2, Extended Data Fig. 6**).  
305 Moreover, we found non-degradative (non-K48) ubiquitination associated with multiple Golgi SNAREs  
306 (Gos1, Ykt6, Sed5) and the COPI machinery (**Fig. 4b-d, f-i, Extended Data Fig. 7, 8**), and that these  
307 ubiquitin modifications were essential for the stabilization of COPI, Arf, and Golgi SNARE complexes  
308 (**Fig. 5**). For Gos1, the ubiquitin-stabilized SNARE-COPI-Arf complex lacks the ArfGAP Glo3 (**Fig. 6**).  
309 These studies highlight the important role of ubiquitination in COPI-mediated trafficking, specifically in  
310 the regulation of Golgi SNARE localization.

311 The type of ubiquitin linkages required for intra-Golgi SNARE interaction with COPI appears to be  
312 different from the ubiquitin linkages required to sort Snc1.  $\beta'$ -COP binds preferentially to K63-linked  
313 polyUb chains and does not bind monoUb, diUb or K48-linked polyUb chains<sup>31</sup>. Replacement of the N-  
314 terminal WDR domain of  $\beta'$ -COP with the NZF domain from Tab2, which binds specifically to k63-  
315 linked polyUb, substantially restores Snc1 trafficking to the plasma membrane<sup>31</sup> (**Fig. 2b**). Surprisingly,  
316 the  $\beta'$ -COP-Tab2<sub>NZF</sub> fusion fails to support the trafficking of Bet1 or Gos1 and only partially supports the  
317 trafficking of Sec22 (**Fig. 2a-f, Extended Data Fig. 1**). We further explored the binding specificity of  $\beta'$ -  
318 COP and found that it is also capable of binding linear polyUb chains and to K6-, K11- and K29- polyUb  
319 chains (**Fig. 2g-h**). Moreover, the polyUb chains detected in the SNARE or COPI pulldowns are resistant  
320 to M1-, K63- or K48-specific DUBs (**Extended Data Fig. 8**). Thus, the ubiquitin modifications present  
321 are unlikely to be targeting COPI to the proteasome or the SNAREs to the vacuole for degradation. Our  
322 data provide compelling evidence that the non-proteolytic ubiquitin code regulates the COPI-dependent  
323 trafficking patterns for Golgi SNAREs.

324 PolyUb chains on SNAREs could form a sorting signal that COPI recognizes in order to recycle them  
325 from downstream compartments, as previously proposed for Snc1<sup>31</sup>. However, several observations in the  
326 current study suggest broader roles of ubiquitination in regulating SNARE trafficking. For example, the  
327 medial Golgi localization of Bet1 relies on COPI's ability to bind ubiquitin, but we could not detect  
328 ubiquitinated forms of this SNARE (**Fig. 4b-d**). However, ubiquitination was associated with other  
329 SNAREs, including Gos1, Ykt6, and Sed5, multiple COPI subunits, and ArfGAP Glo3 (**Fig. 4b-d, f-i,**  
330 **Extended Data Fig. 7, 8**). It is possible that Bet1 associates with another cargo protein that is  
331 ubiquitinated, and the ubiquitin serves as the COPI-dependent sorting signal for both proteins. It is also  
332 possible that ubiquitination induces conformational changes in COPI driven by  $\beta'$ -COP interaction with  
333 ubiquitin attached to itself or to other COPI subunits. Such a COPI conformational change could produce  
334 a high-affinity binding site for Bet1. The role of ubiquitin in mediating the stability of the COPI-SNARE

335 complex is further supported by the observation that Bet1 and Gos1 are mislocalized when ubiquitin is  
336 stripped from COPI-SNARE system by fusing a deubiquitinase domain to COPI components (**Fig 3**).

337 We were surprised to find that COPI was co-enriched with Gos1-FLAG in the SILAC-based mass  
338 spectrometry data (**Fig. 4e**) because cargo-coat interactions are typically low affinity. Arf1 was also  
339 present in this dataset, although not as highly enriched as the COPI subunits. We considered the  
340 possibility that the conditions used to pulldown Gos1-FLAG that preserve ubiquitination may have  
341 stabilized the COPI-Gos1 interaction. Indeed, performing these Gos1-FLAG pulldowns in the presence of  
342 active DUBs to remove ubiquitin dramatically reduces the amount of COPI and Arf recovered with Gos1-  
343 FLAG relative to samples prepared with DUB inhibitors present (**Fig. 5e-g**). The interaction between  
344 Gos1 and COPI/Arf is nearly undetectable if ubiquitination of the components is not preserved. Bet1  
345 interaction with Arf/COPI is also enhanced substantially under conditions that preserve ubiquitination  
346 (Extended Data **Fig.9d-f**). Therefore, ubiquitination appears to regulate the assembly and/or stability of  
347 the COPI-cargo complex independent of the ubiquitination status of cargo. Not all ubiquitinated SNAREs  
348 relied on COPI-ubiquitin interaction for their sorting, For example, Sed5 is ubiquitinated but its  
349 localization not affected by the alterations in the ability of COPI to recognize and bind ubiquitin (**Fig. 4**  
350 **h-i, Extended Data Fig. 1, Sed5**), and Sed5 appears to be independent of COPI for its Golgi  
351 localization<sup>24</sup>. A subset of Golgi SNAREs is dependent on the ability of COPI to bind ubiquitin  
352 (**Extended Data Fig. 1**), and it is likely that other ubiquitin-independent interactions contribute to cargo  
353 selection.

354 Our data provide an exciting window into understanding the molecular details of organelle homeostasis in  
355 cells, particularly Golgi biology. SNARE trafficking patterns must play a critical role in establishing the  
356 organization and function of the Golgi complex. Bet1 is a v-SNARE that forms a fusogenic SNARE  
357 complex with the early Golgi syntaxin Sed5, R-SNARE Sec22, and Bos1<sup>15, 46, 47</sup>. Sed5 and Sec22 are  
358 ubiquitinated and could possibly facilitate retrieval of Bet1 in COPI vesicles. However, the trafficking  
359 patterns for these SNAREs are different. Bet1 does not recycle back to the ER as one would expect if  
360 Bet1 was serving as the v-SNARE in COPII vesicles. In contrast, Sed5, Sec22 and Bos1 do recycle  
361 through the ER, and therefore, it is possible that this trimeric complex is the active fusogenic SNARE in  
362 COPII vesicles budding from the ER<sup>33, 40, 48</sup>. A key event in Golgi biogenesis may be the fusion of ER-  
363 derived COPII vesicles bearing Sed5-Sec22-Bos1 with Golgi-derived COPI vesicles bearing the v-  
364 SNARE Bet1 and also carrying early Golgi enzymes.

365 One of the long-standing questions about COPI-mediated vesicular trafficking has been the essential roles  
366 of  $\alpha$  and  $\beta$ 'COP WDR domains.  $\alpha$  and  $\beta$ 'COP WDR domains are essential for the sorting of dilysine motif  
367 COPI cargoes, but cells are viable when all dilysine sites mutated<sup>13</sup>. These studies indicated possible

368 additional roles of COPI WDR domains in cells. Our studies address this critical question by showing the  
369 essential role of  $\beta'$ COP WDR in binding ubiquitin and mediating localization of ubiquitinated cargoes.

370 Another key element of vesicle-mediated trafficking is the ability of the coat to bind cargo during vesicle  
371 formation, followed by dissociation after the vesicle forms. SNAREs are thought to prime coat assembly  
372 through interactions with Arf, ArfGAPs, and COPI as a mechanism to ensure vesicles form with an  
373 adequate load of v-SNAREs<sup>19, 49</sup>. The ArfGAP Glo3 contains a BoCCS motif that mediates binding to  
374 both COPI and to several different SNAREs, suggesting that Glo3 is a key determinant of the priming  
375 complex<sup>50</sup>. However, it is unclear how Glo3 could facilitate coat assembly when its enzymatic function is  
376 to inactivate Arf. We have identified a ubiquitin-stabilized complex between Gos1, Arf and COPI that  
377 lacked endogenous Glo3 (**Fig. 4**). We were able to detect a tagged form of Glo3 in Gos1  
378 immunoprecipitates that lack ubiquitin; however, preserving ubiquitin in these Gos1 pulldowns had no  
379 influence on Glo3 recovery even though substantially more Arf and COPI were recovered. The presence  
380 of ubiquitin modifications on COPI and Glo3 does not prevent their interaction because we observed  
381 enrichment of Glo3 in COPI pulldowns under the same ubiquitin-preserved conditions. Therefore, we  
382 suggest that the SNARE/Arf-GTP/COPI priming complex is stabilized by ubiquitination of the  
383 components and is devoid of ArfGAP. Arf-GDP and COPI likely dissociate rapidly from the complex as  
384 the ArfGAP binds (**Fig.6h**).

385 Ubiquitin-dependent enrichment of Arf and COPI with SNAREs suggests that cycles of ubiquitination  
386 and deubiquitination could control the switch from Arf-GTP/SNARE-mediated assembly of COPI during  
387 budding and ArfGAP-mediated disassembly and uncoating of vesicles prior to fusion. Ubiquitination-  
388 deubiquitination cycles for key components within the COPI-SNARE system thus may alter the coatome  
389 assembly-disassembly dynamics regulating COPI function.

## 390 **Methods**

391

### 392 **Reagents.**

393 ANTI-FLAG M2 Magnetic Beads (M8823), EZview™ Red ANTI-FLAG® M2 Affinity Gel (F2426 ),  
394 3xFLAG Peptide (F4799), N-Ethylmaleimide (E3876), Iodoacetamide (GERPN6302), 1,10-  
395 Phenanthroline (131377), N-Ethylmaleimide (E3876), deubiquitinase inhibitor PR-619 (SML0430),  
396 protease inhibitor tablets (04693159001), phosphatase inhibitors tablets (PHOSS-RO) were purchased  
397 from MilliporeSigma (St Louis, MO). Coomassie Brilliant Blue R-250 Dye (20278), and FM4-64 dye (T-  
398 3166) were purchased from ThermoFisher Scientific (San Jose, CA). ECL Prime Western Blotting  
399 Chemiluminescent Substrate (34580), Pierce™ Anti-HA Agarose (26181) were purchased from Thermo  
400 Scientific (Rockford, IL). Deubiquitinases (DUBs) Usp2 (E-504), MINDY2 (E-620), MINDY3 (E-621),  
401 OTULIN (E-558), AMSH (E-548B), K6-ubiquitin trimer (Ub3) chains (UC-20-025), K11-Ub3 chains  
402 (UC-50-025), K29- Ub3 chains (UC-85-025), and K33-Ub3 (UC-105-025) were from BostonBiochem-  
403 R&D Systems, Inc. (MN, USA)

### 404 **Antibodies.**

405 ANTI-FLAG® antibody produced in mouse (clone M2, F3165, 1:3500) and Anti-HA antibody produced  
406 in rabbit (H6908, 1:1000) were purchased from MilliporeSigma (St. Louis, MO). VU101: Anti-ubiquitin  
407 Antibody (VU-0101, 1:1000) was purchased from LifeSensors (PA, USA). Anti-mouse HRP conjugate  
408 (W4021, 1:10,000) and Anti-Rabbit HRP Conjugate (W4011, 1:10,000) were purchased from Promega  
409 (Madison, WI). Anti-COPI antibody was a gift from Charles Barlowe (Dartmouth Univ, 1:3000). Anti-  
410 Arf antibody (1:3000) used was reported previously<sup>51</sup>. Anti-GST antibody (1:1000) was purchased from  
411 Vanderbilt Antibody Product Store (VAPR, Nashville, TN).

412

### 413 **Strains and plasmids.**

414 Standard media and techniques for growing and transforming yeast were used. Epitope tagging of yeast  
415 genes was performed using a PCR toolbox<sup>52,53</sup>. The list of yeast strains used in this study are included as  
416 a table file (Supplementary file 1). Plasmid constructions were performed using standard molecular  
417 manipulation. Mutations were introduced using Gibson Assembly Master Mix. The list of plasmids used  
418 in this study is included as a table file (Supplementary file 2).

419

### 420 **Imaging and image analysis.**

421 To visualize mNeonGreen- or mScarlet-tagged proteins, cells were grown to early-to-mid-logarithmic  
422 phase, harvested, and resuspended in imaging buffer (10 mM Na<sub>2</sub>PHO<sub>4</sub>, 156 mM NaCl, 2 mM KH<sub>2</sub>PO<sub>4</sub>,  
423 and 2% glucose). Cells were then mounted on glass slides and observed immediately at room

424 temperature. Images were acquired using a DeltaVision Elite Imaging system equipped with a 63×  
425 objective lens followed by deconvolution using SoftWoRx software (GE Healthcare Life Science).  
426 Overlay images were created using the merge channels function of ImageJ software (National Institutes of  
427 Health). To quantify SNAREs colocalization, a Pearson's Correlation Coefficient (PCC) for the two  
428 markers in each cell (n =3, over 20 cells each) was calculated using the ImageJ plugin Just Another  
429 Colocalization Plugin with Costes Automatic Thresholding <sup>54</sup>.

430

431 Identification and quantitation of fluorescence-based morphological patterns were performed as below:  
432 the punctate pattern indicates small, dotted structures, typically around 0.2 – 0.3 μm, the ring-like  
433 structures indicate larger, roughly donut-shaped structures approximately 2-4 times larger than the  
434 'punctate' structures, and elongated tube-like structures indicate tube-like structures, approximately 2-5  
435 times in length along the plane compared to the 'punctate' pattern. Each fluorescent structure in the cell  
436 was categorized as puncta, ring or tubule and the number of tubules + ring divided by total fluorescent  
437 structures was used to quantify the % tubular and ring structures. Measurements were done in minimum  
438 of 50 cells (n ≥50) for 3 biological replicates. Fluorescence pattern identification and quantitation were  
439 repeated in a blinded fashion and/or by a second observer to avoid bias.

440

#### 441 **Synthesis of K63 and linear ubiquitin chains:**

442 To synthesize K63 linked Ub chains, 2 mM Ub, 300 nM E1, 3 μM UBE2N/UBE2V2 were mixed in the  
443 reaction buffer (50 mM Tris-HCl pH 7.5, 50 mM NaCl, 10 mM MgCl<sub>2</sub>, 20 mM ATP, and 2 mM DTT)  
444 overnight at 37°C. Reactions were quenched by lowering the pH to 4.5 with addition of 5 M ammonium  
445 acetate pH 4.4. K63 tri-Ub were isolated and further purified using size exclusion chromatography  
446 (HiLoad 26/600 Superdex 75 pg, GE Healthcare) in gel filtration buffer (50 mM Tris-HCl pH 7.5, 150  
447 mM NaCl, 1 mM DTT). Purified chains were buffer exchanged into H<sub>2</sub>O and lyophilized. Recombinant  
448 M1-linked tri-Ub-FLAG-6XHis was expressed and purified as previously described<sup>55</sup>. Briefly, *E. coli*  
449 C41(DE3) cells at OD<sub>600</sub> of 0.6 were induced with 1 mM IPTG, lysed by sonication in ice-cold Tris buffer  
450 (50 mM Tris pH 8.0, 150 mM NaCl, 10 mM imidazole, 2 mM βME, complete protease inhibitors  
451 (Roche, Basel, Switzerland), 1 μg/ml DNase, 1 μg/ml lysozyme, and 1 mM PMSF), and clarified by  
452 centrifugation (50,000 x g for 30 min at 4°C) and filtration (0.45 μm filter). M1 tri-Ub was purified to  
453 homogeneity by Ni<sup>2+</sup>-NTA affinity column (Thermo Scientific, Rockford, IL) chromatography, HiPrep  
454 Q FF anion exchange column (GE Healthcare Life Sciences, Marlborough, MA) chromatography, and  
455 HiLoad Superdex size-exclusion column (GE Healthcare Life Sciences, Marlborough, MA)  
456 chromatography.

457



## 458 **Construction FLAG-, HA- and GST-tagged constructs**

459 Multiple strains of *Saccharomyces cerevisiae* were generated in a manner where one of the components is  
460 tagged with an epitope tag. Bet1, Gos1, Snc1 were C-terminally tagged with 6xHis-TEV-3xFLAG by  
461 integration of a PCR product amplified from pJAM617 into the *BET1*, *SNC1* and *SNC2* locus respectively  
462 <sup>52</sup>. Due to the low recombination rate, a *GOS1* PCR product with longer 5' and 3' regions of homology  
463 (over 200bp) was generated from pJAM617 and gene synthesized DNA fragments and integrated into the  
464 *GOS1* locus (two-step PCR and integration method). Properly integrated clones were confirmed by  
465 genotyping PCR as well as by immunoblot using anti-FLAG antibody. Similarly, COP1, Sec27, ArfGAP  
466 Glo3 were C-terminally tagged with 6xHis-TEV-3xFLAG using 2-step PCR and integration method.  
467 Additionally, Glo3 was C-terminally tagged with GST (using pFA6a-GST-HisMX6 as a template) in WT  
468 *S. cerevisiae* as well as in cells harboring 6xHis-TEV-3xFLAG-tagged Gos1. Efforts to C-terminally tag  
469 Ykt6 and Sed5 were unsuccessful; consequently, Ykt6 and Sed5 were N-terminally tagged with 6xHA tag  
470 by integration of a PCR product amplified from pYM-N20 cassette (Euroscarf #P30294).

471

## 472 **Purification of FLAG-tagged or HA-tagged proteins**

473 Affinity isolation of FLAG-tagged or HA-tagged proteins was performed with anti-FLAG magnetic beads  
474 or Anti-HA Agarose, respectively. 800 OD<sub>600</sub> of untagged wild-type cells (BY4742) and cells with C- or  
475 N-terminally tagged protein of interest were grown in YPD and harvested by centrifugation when the  
476 OD<sub>600</sub> reached ~0.8. After washing with cold water, the pellets were resuspended in 3 mL lysis buffer  
477 (100 mM Tris pH 7.4, 150 mM NaCl, 5 mM EDTA, 5 mM EGTA, 10% glycerol, 1% Triton X-100,  
478 100μM PR619, 5 mM 1,10-Phenanthroline, 50 mM N-Ethylmaleimide, phosphatase inhibitors and  
479 complete protease inhibitor tablet). Cells were broken using a Disruptor Genie (Scientific Industries) at  
480 4°C for 10 min at 3000 setting with 0.5 mm diameter glass beads. The lysates were centrifuged at 13,000  
481 rpm for 15 min at 4°C and the supernatant was incubated with 50μL FLAG or HA beads overnight at  
482 4°C. The next morning the beads were washed 3x with washing buffer (100 mM Tris pH 7.4, 150 mM  
483 NaCl, 5 mM EDTA, 1% NP40, 0.5% Triton X-100) and eluted in SDS running buffer.

484 Heterologous expression and purification of GST-β'COP and ubiquitin binding assays were performed as  
485 reported previously<sup>31</sup>. Briefly, 0.5 mM of GST and GST tagged β'COP (604) proteins immobilized  
486 glutathione beads were incubated 250 nM ubiquitin trimer (Ub3) for corresponding linkages, washed 3x  
487 and eluted using reduced glutathione.

488

## 489 **DUB treatments.**

490 The DUB treatments were performed as described <sup>56</sup>. Briefly, the beads with target proteins were equally  
491 split into two parts. One part was subjected to mock treatment as a control, and the other part was

492 incubated with deubiquitinases in the following reaction: 5  $\mu$ l of 10xDUB reaction buffer (1M Tris pH  
493 7.4, 1.5 M NaCl, 10 mM DTT), 0.5  $\mu$ l of deubiquitinase enzyme, and water for a 50  $\mu$ l reaction volume.  
494 The samples were incubated at 37°C for 45 minutes and reactions were stopped with 2x Laemmli sample  
495 buffer by incubating at 95°C for 5 minutes. Supernatants were collected and used for electrophoresis  
496 followed by Western transfer. Deubiquitinases were used following manufacturer recommended  
497 concentrations as follows: DUB: the general deubiquitinase Usp2 (1-5 nM); K48-DUB: K48 linkage  
498 specific deubiquitinase MINDY2 and MINDY3 (10-30 nM); K63-DUB: K63 linkage specific  
499 deubiquitinase AMSH (100-500 nM); M1-DUB: OTULIN (0.05- 1  $\mu$ M). Data were generated from  
500 independent experiments from three biological replicates and quantified as described later.

501  
502 For comparative pulldown samples processed under conditions that preserved endogenous ubiquitination  
503 (w Ub) or catalyzed removal of ubiquitin (w/o Ub), a similar immunoprecipitation and DUB protocol  
504 were used with the following modifications. The cell pellets (800 OD<sub>600</sub>) were divided into two equal  
505 portions. For samples processed under 'w Ub' condition, lysis buffer with deubiquitinase inhibitors (100  
506 mM Tris pH 7.4, 150 mM NaCl, 5 mM EDTA, 5 mM EGTA, 10% glycerol, 0.2 % NP40, 100 $\mu$ M PR619,  
507 5 mM 1,10-Phenanthroline, 50 mM N-Ethylmaleimide, phosphatase inhibitors and complete protease  
508 inhibitor tablet) was used. Immunoprecipitated samples were washed 2x. As a mock treatment for  
509 immunoprecipitated samples under 'w Ub' condition, the deubiquitinase buffer did not have any  
510 deubiquitinases. For the samples processed under conditions that catalyzed removal of ubiquitin (w/o  
511 Ub), the lysis buffer did not have the deubiquitinase inhibitors 100 $\mu$ M PR619, 5 mM 1,10-  
512 Phenanthroline, or 50 mM N-Ethylmaleimide, and furthermore the immunoprecipitated samples were  
513 processed using DUB buffer containing 1 $\mu$ l of each deubiquitinases Usp2, AMSH and OTULIN. Data  
514 were generated from independent experiments from three biological replicates and quantified as described  
515 later.

516  
517 For systematic screening of comparative enrichment of Arf with Gos1 under various ubiquitin-  
518 preserved/ubiquitin-removed conditions in combination with phosphorylation preserved/ phosphorylation  
519 removed conditions the samples were processed as described above with the following modifications to  
520 the procedure. Cells were lysed in the presence of (1) deubiquitinase inhibitors (PR619, O-PA, NEM), (2)  
521 phosphatase inhibitors (PhosSTOP), (3) both deubiquitinase and phosphatase inhibitors or (4) no  
522 additional inhibitors other than the protease inhibitors. Cell lysis in the presence of deubiquitinase and  
523 phosphatase inhibitors is expected to preserve ubiquitin and phosphorylation-mediated complexes. Cell  
524 lysis in the presence of just deubiquitinase or phosphatase inhibitors is expected to preserve only ubiquitin  
525 or phosphorylation-mediated complexes. Cell lysis in the absence of both deubiquitinase and phosphatase

526 inhibitors in expected to not preserve ubiquitin or phosphorylation mediated complexes. Following  
527 immunoprecipitation using anti-FLAG resin, the samples were treated with (1) deubiquitinases (USP2,  
528 AMSH and Otulin), (2) phosphatases (Lambda phosphatase), (3) both deubiquitinases and phosphatases  
529 and (4) no post-IP treatment. Post-IP deubiquitination (with USP2, AMSH and Otulin) and/or  
530 dephosphorylation (with Lambda phosphatase) is expected to strip off any preserved or remaining  
531 ubiquitination and phosphorylation, respectively, from the immunoprecipitated samples.

532

### 533 **Immunoblotting with ECL.**

534 Protein samples were separated by 4-20% gradient SDS-PAGE followed by immunoblotting. For anti-  
535 ubiquitin antibody the membranes were treated with glutaraldehyde solution (supplied with the antibody)  
536 as per manufacturer's protocol and washed with PBS. The membranes were blocked in 5% non-fat milk  
537 for 1 hour, incubated with primary antibodies for 3h at room temperature, washed 5 times with TBS with  
538 0.1% Tween, incubated with appropriate secondary antibody for 1h at room temperature, washed 5 times  
539 and imaged using manufacturer recommended chemiluminescence protocol. The membranes were  
540 imaged with AI600 Chemiluminescent Imager (GE Life Sciences). Quantitative analysis of Western Blot  
541 images was performed using ImageJ software.

542

### 543 **SILAC Mass spectrometry**

544 SILAC-based mass spectrometric analysis of Gos1-FLAG with untagged control was performed using a  
545 similar protocol as described previously<sup>57</sup>. Briefly, an equal amount of cells (labeled with either light or  
546 heavy Arg and Lys) expressing endogenous FLAG-tagged Gos1 or untagged cells were harvested from  
547 the mid-log phase and disrupted by bead beating using ice-cold lysis buffer (50 mM Tris-HCl, pH 7.5,  
548 150 mM NaCl, 5 mM EDTA, 0.2% NP-40, 10 mM iodoacetamide, 1 mM 1,10-phenanthroline, 1×  
549 EDTA-free protease inhibitor cocktail [Roche], 1 mM phenylmethylsulfonyl fluoride, 20 μM MG132, 1×  
550 PhosStop [Roche], 10 mM NaF, 20 mM BGP, and 2 mM Na<sub>3</sub>VO<sub>4</sub>). Lysate was clarified by centrifugation  
551 at 21,000 × g for 10 min at 4°C and supernatant was transferred into a new tube and diluted with three-  
552 fold volume of ice-cold TBS (50 mM Tris-HCl, pH 7.5, 150 mM NaCl). Samples were incubated with 50  
553 μL of EZview anti-FLAG M2 resin slurry (Sigma) for 2 hr at 4°C with rotation. The resin was washed  
554 three times with cold TBS and incubated with 90 μL elution buffer (100 mM Tris-HCl, pH 8.0, 1% SDS)  
555 at 98°C for 5 min. The collected eluate was reduced with 10 mM DTT, alkylated with 20 mM  
556 iodoacetamide, and precipitated with 300 μL PPT solution (50% acetone, 49.9% ethanol, and 0.1% acetic  
557 acid). Light and heavy protein pellets were dissolved with Urea-Tris solution (8 M urea, 50 mM Tris-HCl,  
558 pH 8.0). Heavy and light samples were combined, diluted four-fold with water, and digested with 1 μg  
559 MS-grade trypsin (Gold, Promega) by overnight incubation at 37°C. Phosphopeptides were enriched by

560 immobilized metal affinity chromatography (IMAC) using Fe(III)-nitrilotriacetic acid resin as previously  
561 described (MacGurn et al., 2011) and dissolved in 0.1% trifluoroacetic acid and analyzed by LC-MS/MS  
562 using an Orbitrap XL mass spectrometer. Data collected were searched using MaxQuant (ver. 1.6.5.0) and  
563 chromatograms were visualized using Skyline (ver. 20.1.0.31, MacCoss Lab). Coimmunoprecipitation  
564 followed by SILAC-based mass spectrometric analysis of  $\alpha$ -COP-FLAG was performed as described  
565 above.

566

### 567 **Statistical analysis**

568 Statistical differences between two groups for SNARE morphology were determined using a Fisher's  
569 exact test. For multiple group comparison, one-way ANOVA on the means using GraphPad Prism  
570 (GraphPad Software Inc.). Probability values of less than 0.05, 0.01 and 0.001 were used to show  
571 statistically significant differences and are represented with \*, \*\* or \*\*\* respectively. To quantify  
572 Western blot data, at least three independent replicates were used, and intestines were calculated using  
573 ImageJ software and statistical analyses, as indicated, were performed using GraphPad Prism.

574

### 575 **Acknowledgements**

576 We thank Dr. Scott Emr (Cornell University) and Dr. Aki Nakano (Riken Institute) for plasmids and  
577 strains. We thank Charles Barlow for the anti-COPI antibody. We thank Kristie Lindsey Rose (Vanderbilt  
578 University, Proteomics Core Laboratory) for help with processing mass spectrometry samples. These  
579 studies were supported by NIH Grants 1R01GM118452 (to TRG), 5R01GM058202 (to RCP),  
580 1R35GM119525 (to LPJ) and 1R01GM118491 (to JAM). Lauren P Jackson is a Pew Scholar in the  
581 Biomedical Sciences, supported by the Pew Charitable Trusts.

### 582 **Author contributions:**

583 Swapneeta Date – designed and performed the majority of the experiments, analyzed results and  
584 contributed to writing - original draft, reviewing and editing. Peng Xu, Nicholas S. Diab, Jordan Best –  
585 designed and performed initial SNARE localization experiments, analyzed results, and contributed to  
586 writing - reviewing and editing. Nathaniel L. Hepowit – designed strategy and assisted with SILAC  
587 experiments and contributed to writing - reviewing and editing. Boyang Xie - designed strategy and  
588 assisted with  $\beta$ 'COP purification and contributed to writing - reviewing and editing. Jiale Du synthesized  
589 and purified K63 ubiquitin trimers. Eric R. Strieter mentored and supervised Jiale Du and contributed to  
590 writing—reviewing and editing. Lauren P Jackson contributed to conceptualization, resources (protein  
591 purification), funding acquisition, writing—reviewing and editing, mentoring and supervision of Boyang  
592 Xie. Jason A MacGurn contributed to conceptualization, resources including DeltaVision Deconvolution

593 Microscope, funding acquisition, writing—reviewing and editing, and mentoring and supervision of  
594 Nathaniel L. Hepowit. Todd R. Graham - vision, conceptualization, funding acquisition, methodology,  
595 project administration, writing—original draft, reviewing and editing, mentoring and supervision of  
596 Swapneeta S. Date, Peng Xu, Nicholas S. Diab and Jordan Best, and supervised the whole project.

597  
598

599 **Competing Interests statement**

600 All authors declare no competing financial and/or non-financial interests in relation to the work described.

## References

- 601  
602  
603 1. Bonifacino, J.S. & Glick, B.S. The mechanisms of vesicle budding and fusion. *Cell* **116**, 153-166 (2004).  
604 2. Spang, A. Retrograde traffic from the Golgi to the endoplasmic reticulum. *Cold Spring Harb Perspect Biol*  
605 **5** (2013).  
606 3. Schmid, S.L. Clathrin-coated vesicle formation and protein sorting: an integrated process. *Annu Rev*  
607 *Biochem* **66**, 511-548 (1997).  
608 4. Brandizzi, F. & Barlowe, C. Organization of the ER-Golgi interface for membrane traffic control. *Nat Rev*  
609 *Mol Cell Biol* **14**, 382-392 (2013).  
610 5. Letourneur, F. *et al.* Coatamer is essential for retrieval of dilysine-tagged proteins to the endoplasmic  
611 reticulum. *Cell* **79**, 1199-1207 (1994).  
612 6. Tojima, T., Suda, Y., Ishii, M., Kurokawa, K. & Nakano, A. Spatiotemporal dissection of the trans-Golgi  
613 network in budding yeast. *Journal of Cell Science* **132** (2019).  
614 7. Serafini, T. *et al.* ADP-Ribosylation factor is a subunit of the coat of Golgi-derived COP-coated vesicles: A  
615 novel role for a GTP-binding protein. *Cell* **67**, 239-253 (1991).  
616 8. Waters, M.G., Serafini, T. & Rothman, J.E. 'Coatamer': a cytosolic protein complex containing subunits of  
617 non-clathrin-coated Golgi transport vesicles. *Nature* **349**, 248-251 (1991).  
618 9. Hsu, V.W. Role of ArfGAP1 in COPI vesicle biogenesis. *Cell Logist* **1**, 55-56 (2011).  
619 10. Thomas, L.L. & Fromme, J.C. Extensive GTPase crosstalk regulates Golgi trafficking and maturation. *Curr*  
620 *Opin Cell Biol* **65**, 1-7 (2020).  
621 11. Ma, W. & Goldberg, J. Rules for the recognition of dilysine retrieval motifs by coatamer. *Embo j* **32**, 926-  
622 937 (2013).  
623 12. Eugster, A., Frigerio, G., Dale, M. & Duden, R. The  $\alpha$ - and  $\beta'$ -COP WD40 Domains Mediate Cargo-  
624 selective Interactions with Distinct Di-lysine Motifs. *Molecular Biology of the Cell* **15**, 1011-1023 (2003).  
625 13. Jackson, L.P. *et al.* Molecular basis for recognition of dilysine trafficking motifs by COPI. *Dev Cell* **23**,  
626 1255-1262 (2012).  
627 14. Ishii, M., Suda, Y., Kurokawa, K. & Nakano, A. COPI is essential for Golgi cisternal maturation and  
628 dynamics. *Journal of Cell Science* **129**, 3251-3261 (2016).  
629 15. Banfield, D.K. Mechanisms of protein retention in the Golgi. *Cold Spring Harb Perspect Biol* **3**, a005264  
630 (2011).  
631 16. Glick, B.S., Elston, T. & Oster, G. A cisternal maturation mechanism can explain the asymmetry of the  
632 Golgi stack. *FEBS Lett* **414**, 177-181 (1997).  
633 17. Kurokawa, K. *et al.* Visualization of secretory cargo transport within the Golgi apparatus. *The Journal of*  
634 *cell biology* **218**, 1602-1618 (2019).  
635 18. Rothman, J.E. & Warren, G. Implications of the SNARE hypothesis for intracellular membrane topology  
636 and dynamics. *Curr Biol* **4**, 220-233 (1994).  
637 19. Rein, U., Andag, U., Duden, R., Schmitt, H.D. & Spang, A. ARF-GAP-mediated interaction between the  
638 ER-Golgi v-SNAREs and the COPI coat. *J Cell Biol* **157**, 395-404 (2002).  
639 20. Chen, Y.A. & Scheller, R.H. SNARE-mediated membrane fusion. *Nature Reviews Molecular Cell Biology*  
640 **2**, 98-106 (2001).  
641 21. Springer, S., Spang, A. & Schekman, R. A primer on vesicle budding. *Cell* **97**, 145-148 (1999).  
642 22. Daste, F., Galli, T. & Tareste, D. Structure and function of longin SNAREs. *J Cell Sci* **128**, 4263-4272  
643 (2015).  
644 23. Fukasawa, M., Varlamov, O., Eng, W.S., Söllner, T.H. & Rothman, J.E. Localization and activity of the  
645 SNARE Ykt6 determined by its regulatory domain and palmitoylation. *Proceedings of the National*  
646 *Academy of Sciences of the United States of America* **101**, 4815-4820 (2004).  
647 24. Gao, G. & Banfield, D.K. Multiple features within the syntaxin Sed5p mediate its Golgi localization.  
648 *Traffic* **21**, 274-296 (2020).  
649 25. Mancias, J.D. & Goldberg, J. The Transport Signal on Sec22 for Packaging into COPII-Coated Vesicles Is  
650 a Conformational Epitope. *Molecular Cell* **26**, 403-414 (2007).  
651 26. Martinez-Arca, S. *et al.* A dual mechanism controlling the localization and function of exocytic v-  
652 SNAREs. *Proceedings of the National Academy of Sciences of the United States of America* **100**, 9011-  
653 9016 (2003).  
654 27. Black, M.W. & Pelham, H.R. A selective transport route from Golgi to late endosomes that requires the  
655 yeast GGA proteins. *J Cell Biol* **151**, 587-600 (2000).



- 656 28. Jackson, L.P. *et al.* A large-scale conformational change couples membrane recruitment to cargo binding in  
657 the AP2 clathrin adaptor complex. *Cell* **141**, 1220-1229 (2010).
- 658 29. Miller, S.E., Collins, B.M., McCoy, A.J., Robinson, M.S. & Owen, D.J. A SNARE–adaptor interaction is a  
659 new mode of cargo recognition in clathrin-coated vesicles. *Nature* **450**, 570-574 (2007).
- 660 30. Tanigawa, G. *et al.* Hydrolysis of bound GTP by ARF protein triggers uncoating of Golgi-derived COP-  
661 coated vesicles. *J Cell Biol* **123**, 1365-1371 (1993).
- 662 31. Xu, P. *et al.* COPI mediates recycling of an exocytic SNARE by recognition of a ubiquitin sorting signal.  
663 *Elife* **6** (2017).
- 664 32. Best, J.T., Xu, P., McGuire, J.G., Leahy, S.N. & Graham, T.R. Yeast synaptobrevin, Sncl, engages distinct  
665 routes of postendocytic recycling mediated by a sorting nexin, Rcy1-COPI, and retromer. *Mol Biol Cell* **31**,  
666 944-962 (2020).
- 667 33. Ossipov, D., Schroder-Kohne, S. & Schmitt, H.D. Yeast ER-Golgi v-SNAREs Bos1p and Bet1p differ in  
668 steady-state localization and targeting. *Journal of Cell Science* **112**, 4135-4142 (1999).
- 669 34. Mullally, J.E., Chernova, T. & Wilkinson, K.D. Doa1 is a Cdc48 adapter that possesses a novel ubiquitin  
670 binding domain. *Mol Cell Biol* **26**, 822-830 (2006).
- 671 35. Moritsugu, K., Nishi, H., Inariyama, K., Kobayashi, M. & Kidera, A. Dynamic recognition and linkage  
672 specificity in K63 di-ubiquitin and TAB2 NZF domain complex. *Scientific Reports* **8**, 16478 (2018).
- 673 36. Gaynor, E.C., Chen, C.Y., Emr, S.D. & Graham, T.R. ARF is required for maintenance of yeast Golgi and  
674 endosome structure and function. *Mol Biol Cell* **9**, 653-670 (1998).
- 675 37. Kattenhorn, L.M., Korb, G.A., Kessler, B.M., Spooner, E. & Ploegh, H.L. A deubiquitinating enzyme  
676 encoded by HSV-1 belongs to a family of cysteine proteases that is conserved across the family  
677 Herpesviridae. *Mol Cell* **19**, 547-557 (2005).
- 678 38. Swaney, D.L. *et al.* Global analysis of phosphorylation and ubiquitylation cross-talk in protein degradation.  
679 *Nat Methods* **10**, 676-682 (2013).
- 680 39. Chen, S.H., Shah, A.H. & Segev, N. Ypt31/32 GTPases and their F-Box effector Rcy1 regulate  
681 ubiquitination of recycling proteins. *Cell Logist* **1**, 21-31 (2011).
- 682 40. Parlati, F. *et al.* Distinct SNARE complexes mediating membrane fusion in Golgi transport based on  
683 combinatorial specificity. *Proc Natl Acad Sci U S A* **99**, 5424-5429 (2002).
- 684 41. Song, H., Torng, T.L., Orr, A.S., Brunger, A.T. & Wickner, W.T. Sec17/Sec18 can support membrane  
685 fusion without help from completion of SNARE zippering. *eLife* **10**, e67578 (2021).
- 686 42. Demircioglu, F.E., Burkhardt, P. & Fasshauer, D. The SM protein Sly1 accelerates assembly of the ER–  
687 Golgi SNARE complex. *Proceedings of the National Academy of Sciences* **111**, 13828-13833 (2014).
- 688 43. Sato, Y. *et al.* Structural basis for specific cleavage of Lys 63-linked polyubiquitin chains. *Nature* **455**, 358-  
689 362 (2008).
- 690 44. Keusekotten, K. *et al.* OTULIN antagonizes LUBAC signaling by specifically hydrolyzing Met1-linked  
691 polyubiquitin. *Cell* **153**, 1312-1326 (2013).
- 692 45. Baek, S.H. *et al.* Molecular cloning of a novel ubiquitin-specific protease, UBP41, with isopeptidase  
693 activity in chick skeletal muscle. *J Biol Chem* **272**, 25560-25565 (1997).
- 694 46. Wang, P., Ye, Z. & Banfield, D.K. A novel mechanism for the retention of Golgi membrane proteins  
695 mediated by the Bre5p/Ubp3p deubiquitinase complex. *Mol Biol Cell* **31**, 2139-2155 (2020).
- 696 47. Dean, N. & Pelham, H.R. Recycling of proteins from the Golgi compartment to the ER in yeast. *J Cell Biol*  
697 **111**, 369-377 (1990).
- 698 48. Ballensiefen, W., Ossipov, D. & Schmitt, H.D. Recycling of the yeast v-SNARE Sec22p involves COPI-  
699 proteins and the ER transmembrane proteins Ufe1p and Sec20p. *J Cell Sci* **111** ( Pt 11), 1507-1520 (1998).
- 700 49. Spang, A., Shiba, Y. & Randazzo, P.A. Arf GAPs: gatekeepers of vesicle generation. *FEBS Lett* **584**, 2646-  
701 2651 (2010).
- 702 50. Schindler, C. & Spang, A. Interaction of SNAREs with ArfGAPs precedes recruitment of Sec18p/NSF.  
703 *Molecular biology of the cell* **18**, 2852-2863 (2007).
- 704 51. Liu, K., Surendhran, K., Nothwehr, S.F. & Graham, T.R. P4-ATPase requirement for AP-1/clathrin  
705 function in protein transport from the trans-Golgi network and early endosomes. *Mol Biol Cell* **19**, 3526-  
706 3535 (2008).
- 707 52. Janke, C. *et al.* A versatile toolbox for PCR-based tagging of yeast genes: new fluorescent proteins, more  
708 markers and promoter substitution cassettes. *Yeast* **21**, 947-962 (2004).
- 709 53. Longtine, M.S. *et al.* Additional modules for versatile and economical PCR-based gene deletion and  
710 modification in *Saccharomyces cerevisiae*. *Yeast* **14**, 953-961 (1998).

- 711 54. Bolte, S. & Cordelieres, F.P. A guided tour into subcellular colocalization analysis in light microscopy. *J*  
712 *Microsc* **224**, 213-232 (2006).
- 713 55. Hepowit, N.L., Pereira, K.N., Tumolo, J.M., Chazin, W.J. & MacGurn, J.A. Identification of ubiquitin  
714 Ser57 kinases regulating the oxidative stress response in yeast. *Elife* **9** (2020).
- 715 56. Hospenhal, M.K., Mevissen, T.E.T. & Komander, D. Deubiquitinase-based analysis of ubiquitin chain  
716 architecture using Ubiquitin Chain Restriction (UbiCRest). *Nature Protocols* **10**, 349-361 (2015).
- 717 57. Hepowit, N.L., Pereira, K.N., Tumolo, J.M., Chazin, W.J. & MacGurn, J.A. Identification of ubiquitin  
718 Ser57 kinases regulating the oxidative stress response in yeast. *eLife* **9**, e58155 (2020).  
719
- 720

721 **Figures**

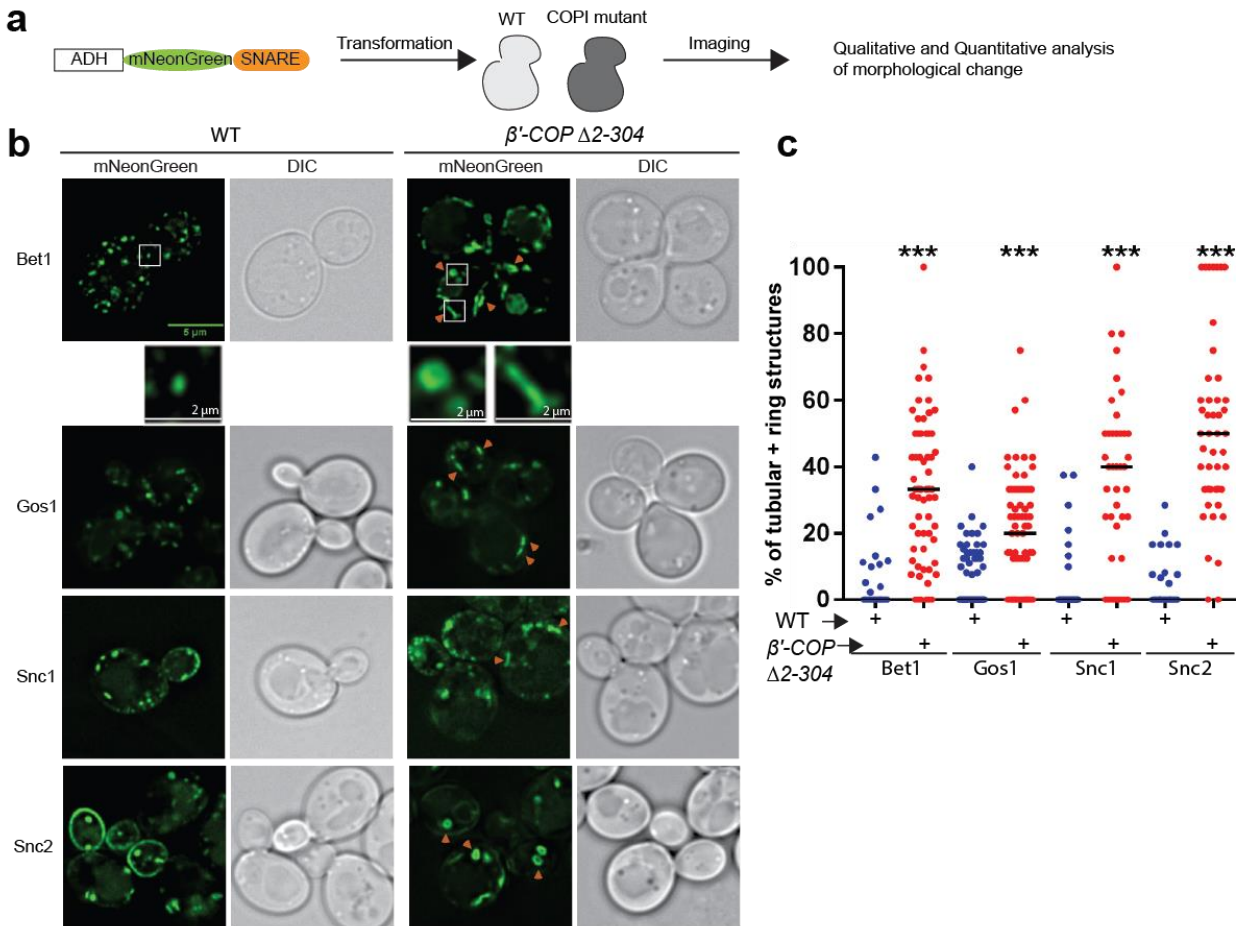

722  
 723 **Figure 1. SNAREs localize to morphologically aberrant structures in COPI mutants:** (a) Schematics of the experimental  
 724 setup wherein SNAREs are individually tagged with mNeonGreen and expressed under constitutive ADH promoter in  
 725 *Saccharomyces cerevisiae* wild-type (WT) cells or in cells with deleted N-terminal WDR of  $\beta'$ -COP ( $\Delta$ 2-304). (b-c) Panels show  
 726 live-cell imaging data in *Saccharomyces cerevisiae*. Significant morphological changes are observed for SNAREs Bet1, Gos1,  
 727 Snc1 and Snc2 wherein the elongated tube-like structures and ring structures (orange arrowheads) are seen in  $\beta'$ -COP  $\Delta$ 2-304  
 728 cells compared to control cells with full-length  $\beta'$ -COP (WT). Statistical differences were determined using a one-way ANOVA  
 729 on the means of the three biological replicates (\*\*\*)  $p < 0.001$ ). Scale bar in represents 5  $\mu$ m.

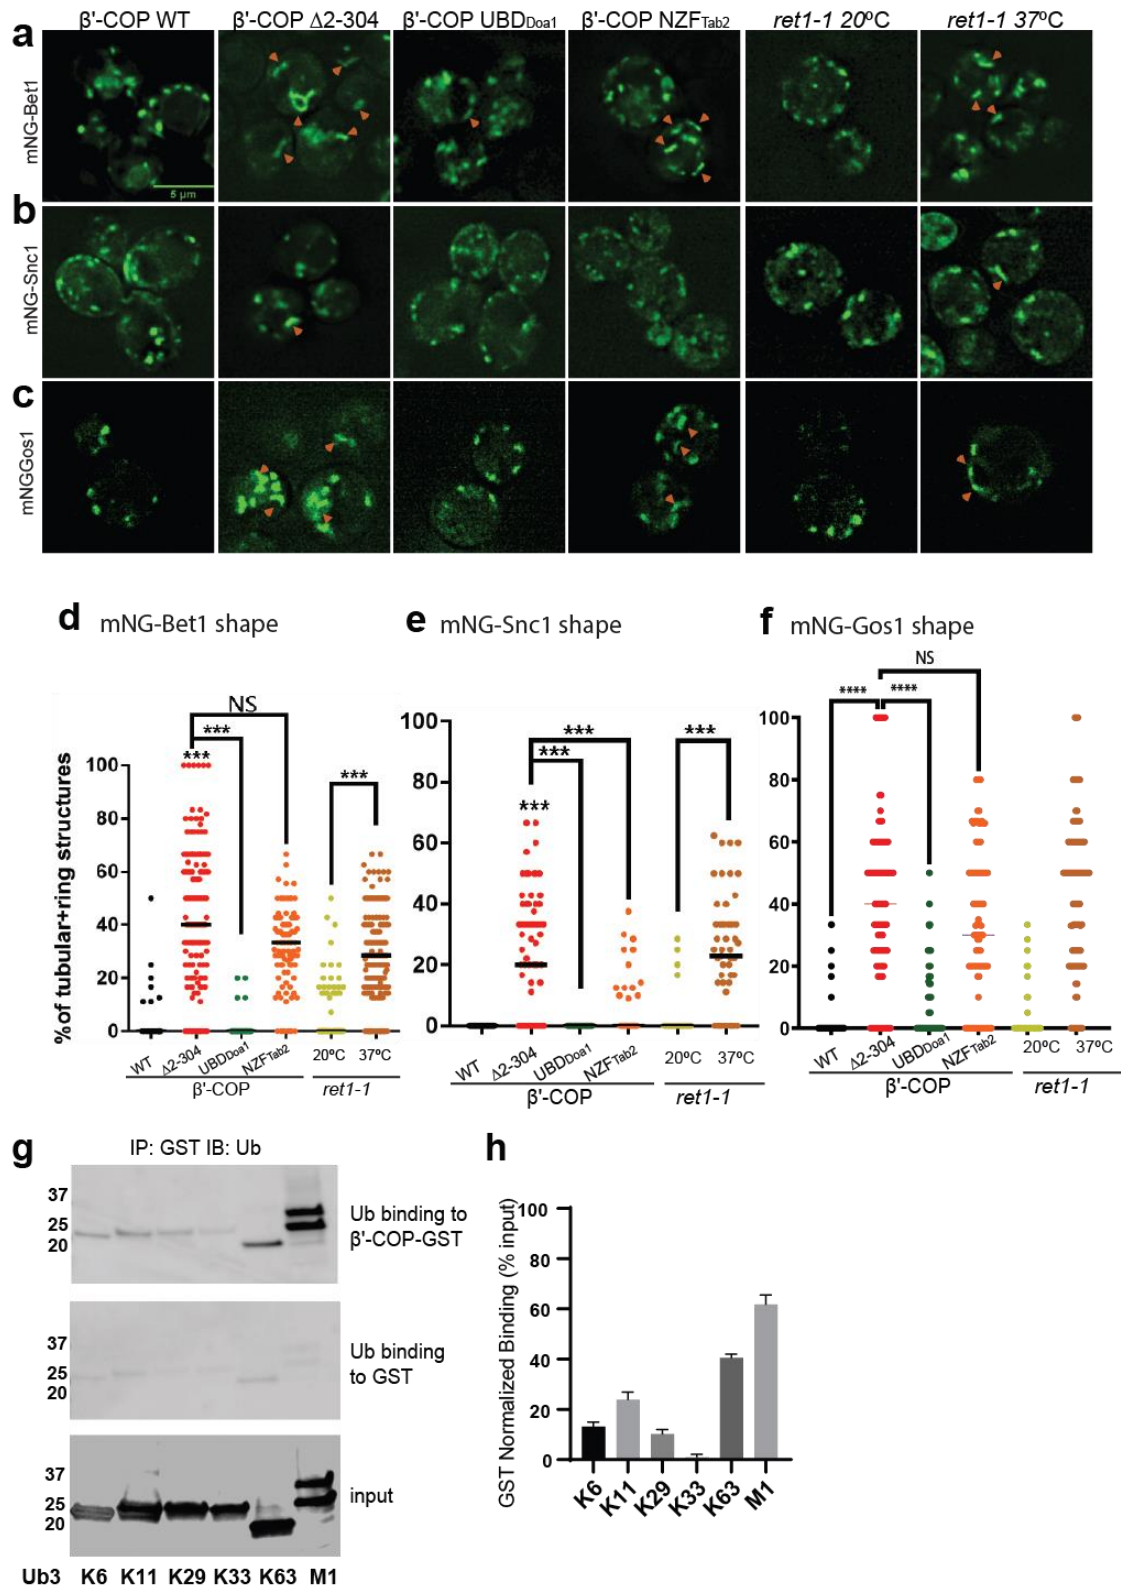

730

731 **Figure 2.  $\beta'$  COP binding to ubiquitin is critical for proper SNARE localization.** (a-c) Deletion of the N-terminal ubiquitin-  
 732 binding WDR of  $\beta'$  COP ( $\Delta 2-304$ ) leads to mislocalization of (a) mNG-Bet1, (b) mNG-Snc1 and (c) mNG-Gos1 into elongated  
 733 tubular and ring-like structures (orange arrowheads). This phenotype is rescued by the replacement of the N-terminal ubiquitin-

734 binding WDR of  $\beta'$ COP by the general ubiquitin binding domain Doa1 ( $\beta'$ -COP UBD<sub>Doa1</sub>). The replacement of N-terminal UBD  
735 of  $\beta'$ COP with K63-specific UBD, NZF<sub>Tab2</sub> ( $\beta'$ COP NZF<sub>Tab2</sub>) rescues the mislocalization phenotype for Snc1 but not for Bet1.  
736 The mislocalization of Bet1 and Snc1 observed in  $\beta'$ COP  $\Delta$ 2-304 cells comparable to COPI inactivation phenotype observed for  
737 *ret1-1* at nonpermissive temperatures. **(d-f)** Statistical differences were determined using a one-way ANOVA on the means of the  
738 three biological replicates (\*\*p<0.001). **(g)** GST- $\beta'$ COP (1-604) binds linear and K63-linked triUb and to some extent to K6,  
739 K11 and K29 triUb relative to the GST-only control. 0.5 mM of GST and GST tagged WDR proteins immobilized glutathione  
740 beads were incubated 250 nM Ub3 for corresponding linkages. **(h)** Quantitation of Ub3 polymers binding (GST-only background  
741 subtracted) relative to input. The values represent mean  $\pm$  SEM from three independent binding experiments. Scale bar in  
742 represents 5  $\mu$ m.

743

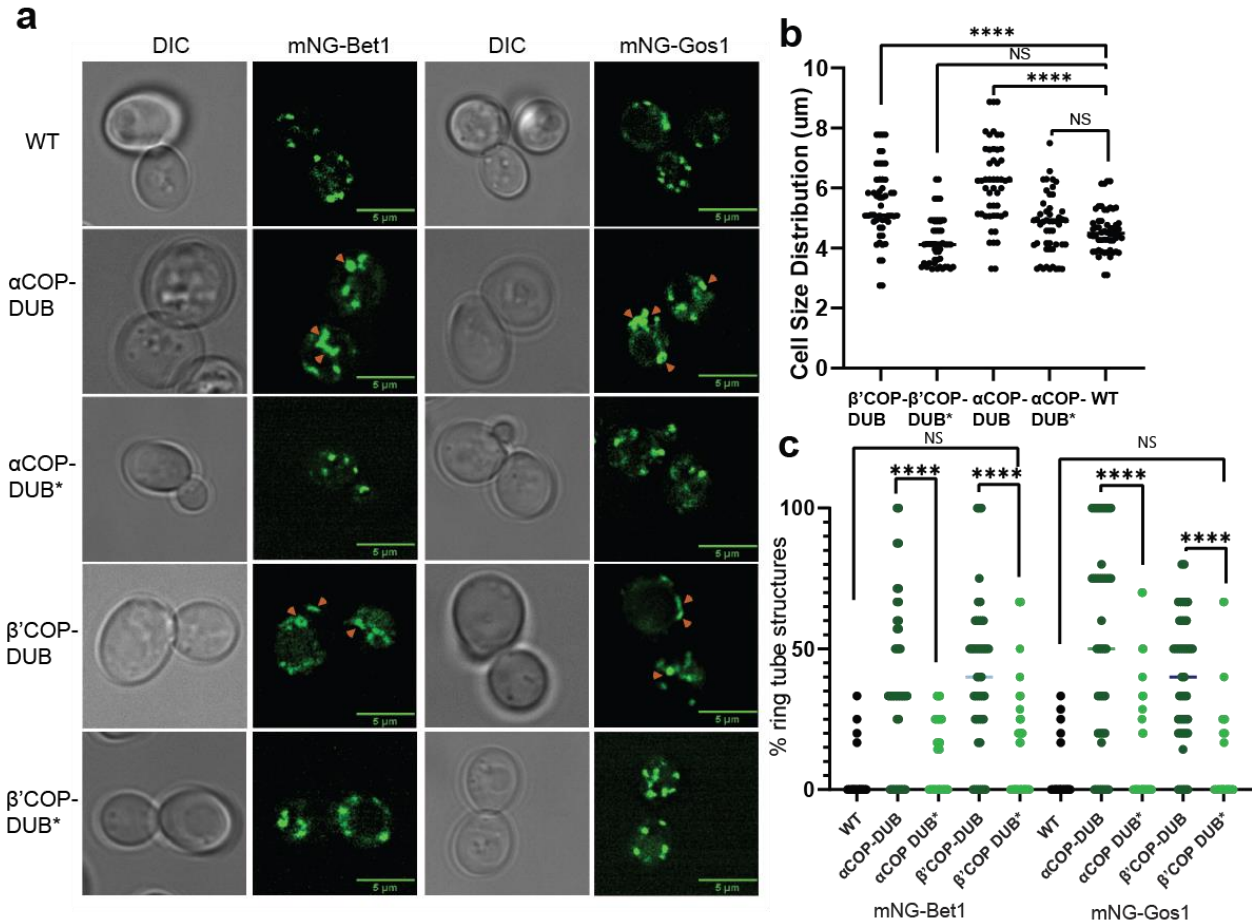

744  
745  
746  
747  
748  
749  
750  
751  
752

**Figure 3. Deubiquitinase fusion to COPI subunits causes SNARE mislocalization.** mNG-tagged Bet1 and Gos1 were imaged in cells in which a deubiquitinase domain (DUB) was fused to the C-terminus of  $\alpha$ - and  $\beta'$ COPI to generate  $\alpha$ COP-DUB and  $\beta'$ COP-DUB, respectively, along with catalytically dead controls  $\alpha$ COP-DUB\* and  $\beta'$ COP-DUB\*. **(a and b)** Cells carrying COPI-DUB fusion were larger in size compared to WT cells as well as catalytically dead controls. **(a and c)** Significant accumulation of Bet1 and Gos1 in the elongated tube- or ring-like or enlarged punctate structures (orange arrows) was observed in  $\alpha$ COP-DUB and  $\beta'$ COP-DUB backgrounds compared to corresponding DUB\* control or WT cells. Statistical differences were determined using a one-way ANOVA on the means of the three biological replicates (\*\*\*) $p < 0.001$ .



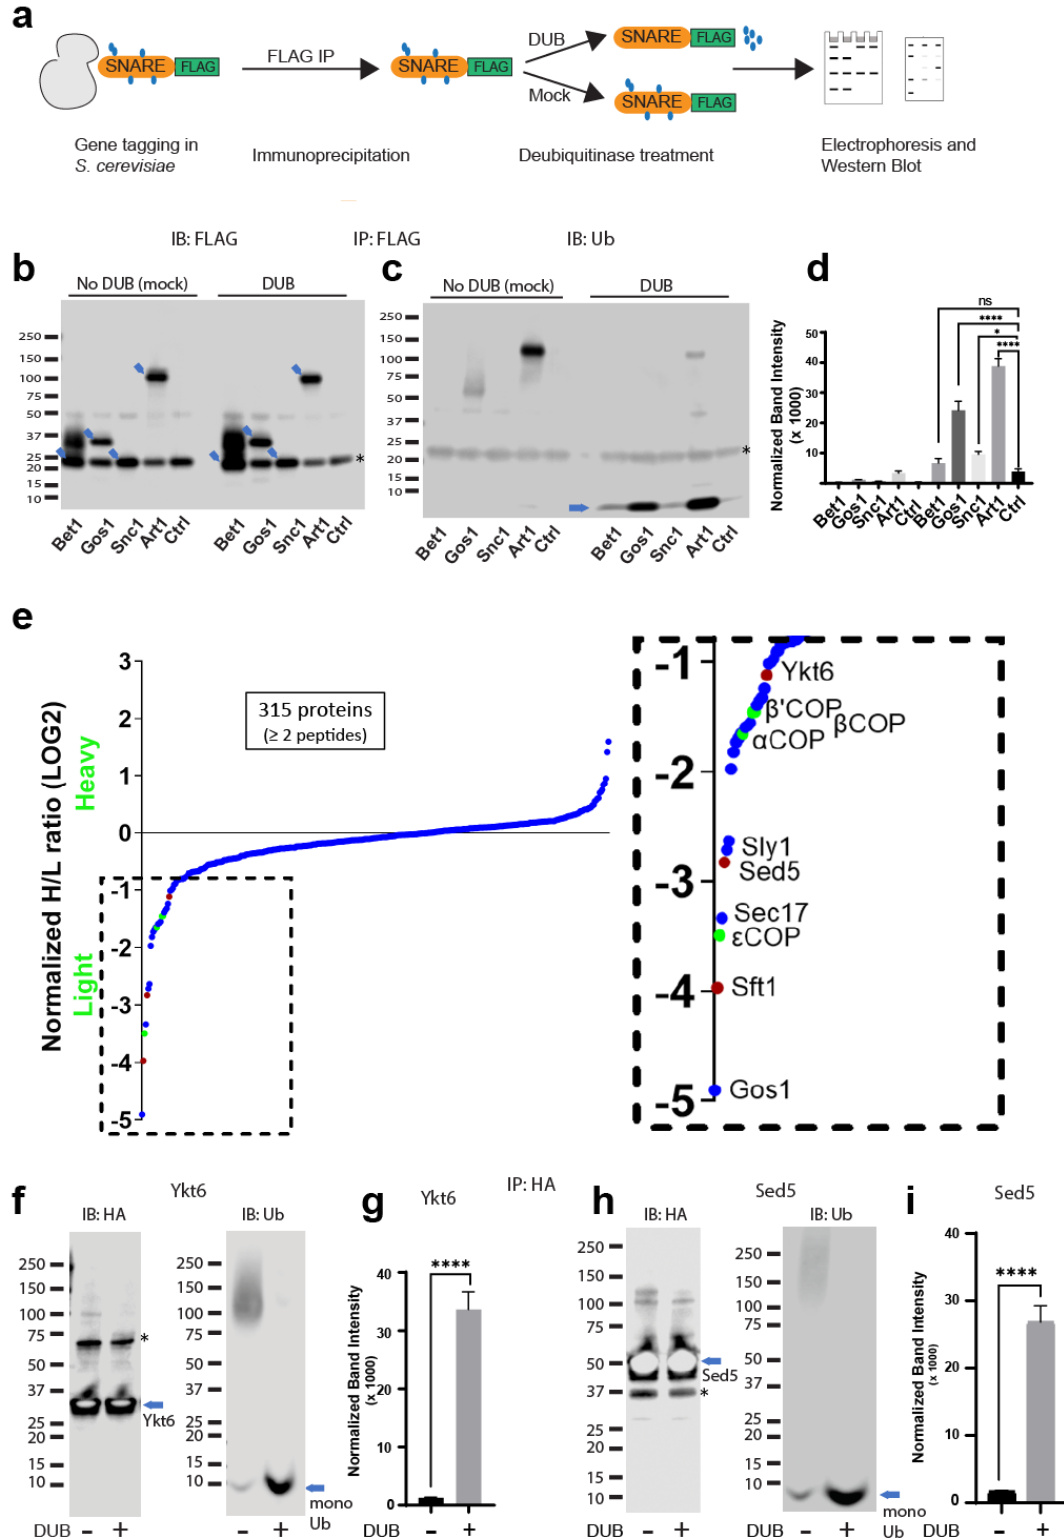

753

754 **Figure 4. Multiple Golgi SNARE complexes are modified with ubiquitin.** (a) Schematic of the experimental setup wherein  
 755 SNAREs were individually tagged with FLAG and immunoprecipitated using anti-FLAG beads. Half the samples were mock-  
 756 treated and the other half was treated with deubiquitinase (DUB). Western blots of samples are probed with FLAG (b) or  
 757 ubiquitin antibody (c). Blue arrows in (b) indicate the position of FLAG-tagged protein and the asterisk indicates the position of a

758 background band. **(d)** Quantitation of the amount of monoubiquitin released from the samples by deubiquitinases. **(e)** SILAC  
759 mass spectrometric analysis of Gos1-FLAG pulldown samples indicates enrichment of SNAREs Sft1, Ykt6 and Sed5 (red dots)  
760 and COPI subunits (green dots) with Gos1. **(f-i)** Western Blot analysis showing HA-tagged Ykt6, and Sed5 probed for  
761 ubiquitination following HA-immunoprecipitation and deubiquitinase treatment. **(g,i)** Quantitation of monoubiquitin. Statistical  
762 differences were determined using a one-way ANOVA with multiple comparison test on three biological replicates (\*\*\*\* $p \leq$   
763 0.0001, \*\*\* $p < 0.001$ , \* $p < 0.05$ , Ns  $p > 0.05$ ).

764

765

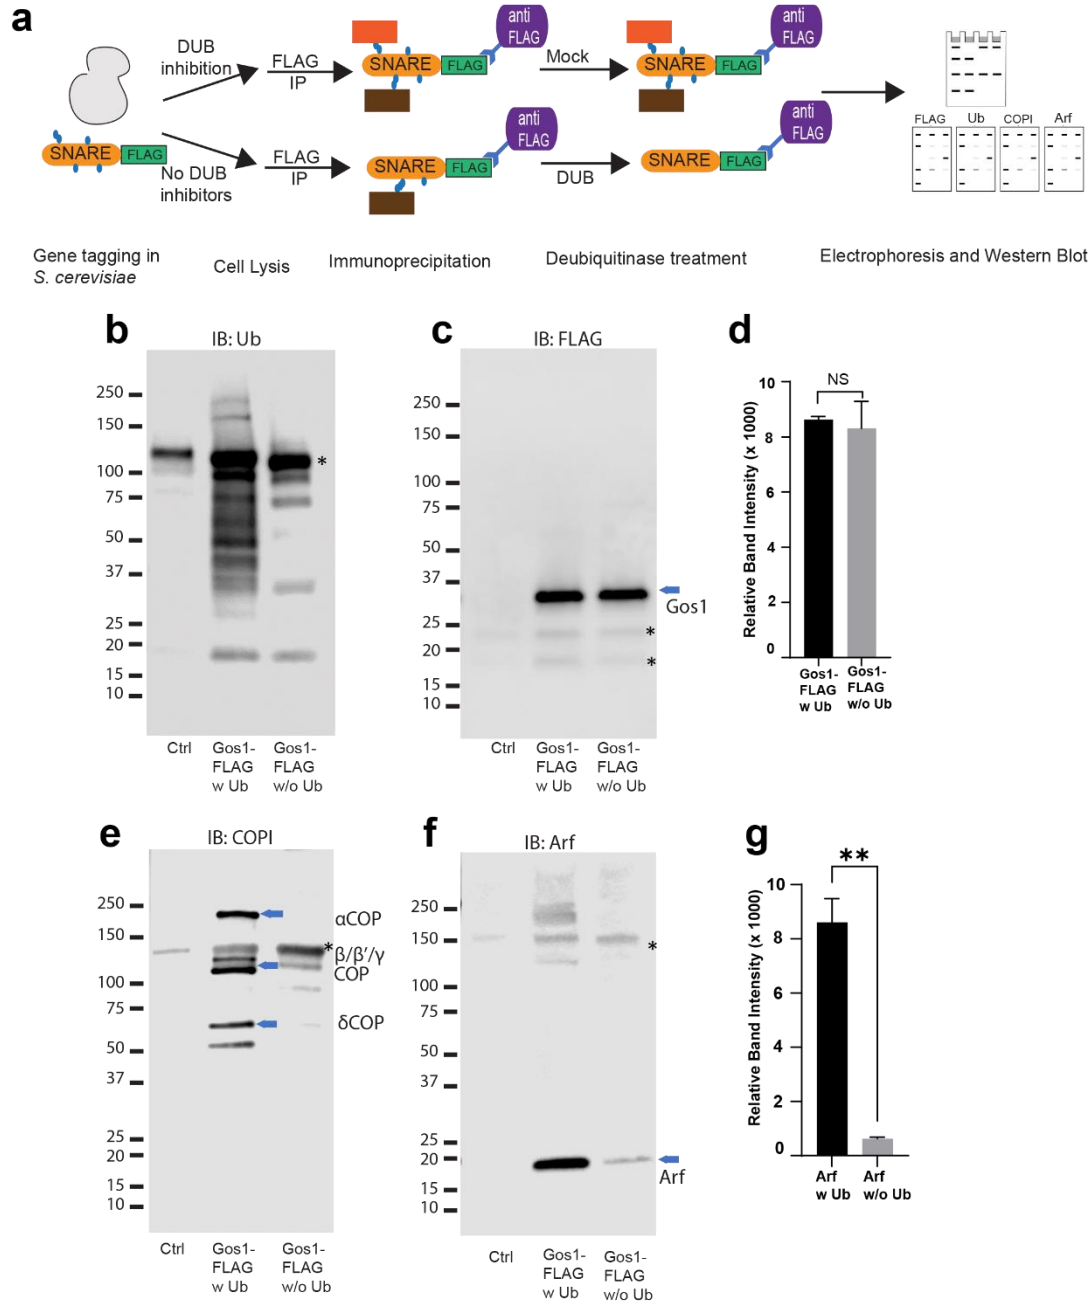

766  
 767 **Figure 5. Ubiquitin modification stabilizes a priming complex between COPI, Arf and SNAREs.** (a) Schematic of the  
 768 experimental setup wherein FLAG-tagged SNAREs are divided into two equal portions, and one is processed under ‘w Ub’  
 769 conditions (DUB inhibitors used during the lysis step and no deubiquitinases (mock) treatment) and the other portion is processed  
 770 under ‘w/o Ub’ condition (no deubiquitinase inhibitors used during lysis and immunoprecipitated samples are treated with  
 771 deubiquitinases). (b-i) Western Blot data showing comparative pulldowns of Gos1-FLAG (b-e) and Bet1-FLAG (f-i) processed  
 772 under ‘ubiquitin-preserved’ (w Ub) and ‘no-ubiquitin’ (w/o Ub) condition, and probed for Ub (b,f), FLAG (c,g), COPI (d,h) and  
 773 Arf (e,i). Untagged cells processed under ‘w UB’ condition to determine background binding were used as a control (Cntr) and  
 774 abundant background bands are marked with an asterisk. Quantitation of (j-k) Gos1-FLAG and Arf, and (l, m) Bet1-FLAG and  
 775 Arf in the pulldown samples. Band intensities are measured using ImageJ. Quantitation was done on three biological replicates  
 776 using a t-test (\*\*\*\* $p \leq 0.0001$ , \*\*\* $p < 0.001$ , \* $p < 0.05$ , Ns  $p > 0.05$ ).

777  
 778

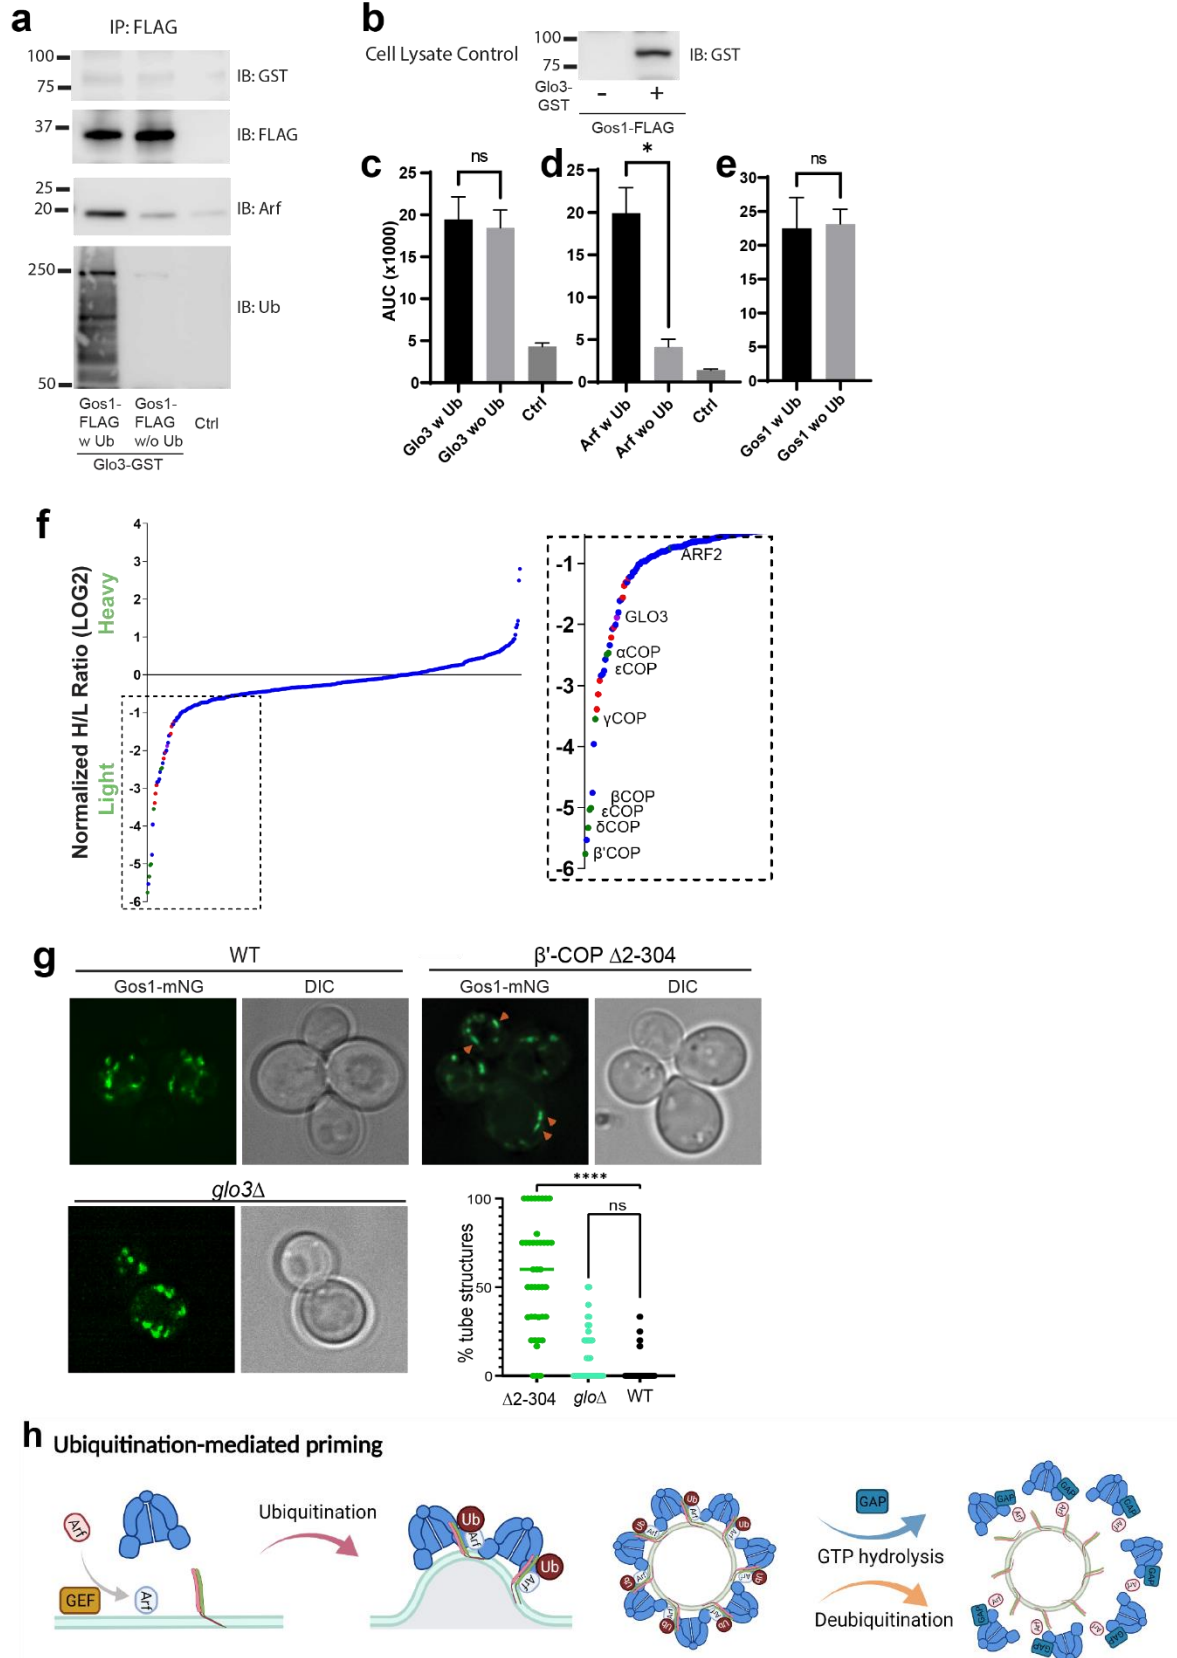

780 **Figure 6. ArfGAP is not enriched in ubiquitin-stabilized SNARE-Coat complexes and is not required for Gos1**  
781 **localization. (a-e)** Western Blot data showing comparative pulldowns of Gos1-FLAG from cells expressing FLAG-  
782 tagged Gos1 and GST-tagged Glo3. Samples were processed under ‘ubiquitin-preserved’ (w Ub) and ‘no-ubiquitin’  
783 (w/o Ub) condition, and probed for Glo3 (anti-GST), Gos1 (anti-FLAG), Arf, and Ub. Untagged cells processed  
784 under ‘w UB’ condition to determine background binding were used as a control (Ctrl). Cell lysates from cells  
785 expressing only FLAG-tagged Gos1 or both FLAG-tagged Gos1 and GST-tagged Glo3 probed with anti-GST  
786 antibody are included as controls to ensure expression of GST-tagged Glo3. Quantitation of (c) Glo3-GST, (d) Arf  
787 and (e) Gos1-FLAG samples. Band intensities are measured using ImageJ. Quantitation was done on three  
788 biological replicates using a t-test (\* $p < 0.05$ , Ns  $p > 0.05$ ). (f) SILAC mass spectrometric analysis of  $\alpha$ COP-FLAG  
789 pulldown samples indicate enrichment of other COPI subunits (green dots), ArfGAP Glo3 (purple dots) and diLys  
790 COPI cargo (red dots) but no SNAREs. (g) Live cell imaging of mNG-Gos1 in WT,  $\beta'$ COP  $\Delta$ 2-304 and *glo3* $\Delta$  cells.  
791 Quantification of % tube structures for each strain was from 3 biological replicates with 60 or more cells analyzed  
792 for each sample. Statistical differences were determined using a one-way ANOVA on the means of the three  
793 biological replicates (\*\* $p < 0.001$ ). Scale bar in represents 5  $\mu$ m. (h) Model showing ubiquitination-mediated  
794 priming of a SNARE-Arf-COPI complex. Glo3 is recruited at later stages after vesicle budding leading to hydrolysis  
795 of Arf-GTP and disassociation of COPI complex.  
796
